# Supplementary material for: Institutional Overlap in Global Governance and the Design of Intergovernmental Organizations
Source: Springer Nature journal article supplement (doi:10.1007/s11558-023-09488-2), 2023-03-28
Supplement: MOESM1 [file 25170172]

# Institutional Overlap in Global Governance and the Design of Intergovernmental Organizations

## Online Appendix

**Table A1** Summary statistics of monadic COW IGO data

| Variable                    | Observations | Mean  | Std. Dev. | Min | Max |
|-----------------------------|--------------|-------|-----------|-----|-----|
| <i>IGO design features</i>  |              |       |           |     |     |
| Secretariat                 | 534          | 0.916 | 0.278     | 0   | 1   |
| Independent secretariat     | 534          | 0.837 | 0.370     | 0   | 1   |
| Voting                      | 534          | 0.560 | 0.497     | 0   | 1   |
| Monitoring                  | 534          | 0.240 | 0.427     | 0   | 1   |
| Enforcement                 | 534          | 0.169 | 0.375     | 0   | 1   |
| Dispute settlement          | 534          | 0.305 | 0.461     | 0   | 1   |
| <i>IGO issue areas</i>      |              |       |           |     |     |
| Security                    | 534          | 0.062 | 0.241     | 0   | 1   |
| Environment                 | 534          | 0.204 | 0.403     | 0   | 1   |
| Health                      | 534          | 0.082 | 0.275     | 0   | 1   |
| Human rights                | 534          | 0.036 | 0.185     | 0   | 1   |
| Trade and commerce          | 534          | 0.296 | 0.457     | 0   | 1   |
| Finance                     | 534          | 0.116 | 0.321     | 0   | 1   |
| Development                 | 534          | 0.367 | 0.482     | 0   | 1   |
| Social affairs              | 534          | 0.412 | 0.493     | 0   | 1   |
| Technical affairs           | 534          | 0.249 | 0.433     | 0   | 1   |
| <i>IGO governance tasks</i> |              |       |           |     |     |
| Standard setting            | 526          | 0.369 | 0.483     | 0   | 1   |
| Implementation              | 526          | 0.348 | 0.477     | 0   | 1   |
| Monitoring                  | 526          | 0.217 | 0.412     | 0   | 1   |
| Funding                     | 526          | 0.196 | 0.397     | 0   | 1   |
| Capacity building           | 526          | 0.281 | 0.450     | 0   | 1   |
| Service provision           | 526          | 0.608 | 0.489     | 0   | 1   |
| Agenda setting              | 534          | 0.502 | 0.500     | 0   | 1   |
| Information gathering       | 534          | 0.815 | 0.389     | 0   | 1   |

### Measuring IGO institutional design

This section provides additional details about the coding of the five institutional design variables included in our data. The variable *secretariat* captures whether an IGO has some kind of secretariat. It refers to an institutional body whose purpose is to assist the organization as a whole or its participants by sharing and circulating information, providing technical assistance, preparing meetings, or similar activities. This secretariat must be a part of the institutional structure of an IGO but does not need to be part of the organization. It can also be provided by another organization. If an institutional body that provides some form of administrative support to the participants in the IGO exists, then *secretariat* is coded 1, otherwise 0.

The variable *monitoring* captures whether an IGO has a monitoring mechanism. It covers any institutional means to observe members' activities with respect to the rules and obligations specified by an IGO. The variable is coded 1 if there is a working group, task force, committee, or other institutional body whose purpose is to collect information about the behavior of the members in an IGO. If there is no evidence for any form of institutionalized monitoring in an IGO, the variable is coded 0. The monitoring can be mandatory or voluntary and conducted by an external auditor as long as it is mentioned as part of an IGO's institutional structure. As for all other design variables in the data, this variable captures institutional design only, not institutional activities or outputs. Thus, whether or not monitoring mechanisms that are in place are actually used or how they are used is not relevant for the coding of this variable. If the organization encourages or authorizes monitoring by its members but does not itself engage in collecting information about participant behavior, the IGO is coded 0 in terms of monitoring.

The variable *enforcement* captures whether an IGO has an enforcement mechanism. The variable is coded 1 if there is an institutional body in an IGO whose purpose is to enforce members' compliance with the rules and standards of the organization. This body can take the form of a working group, a committee, a general assembly, or the chair of an IGO, among others. If there is no evidence for any form of institutionalized enforcement in the IGO, the variable is coded 0. If the organization encourages or authorizes enforcement and sanctioning of non-compliant behavior by its members but does not itself engage in enforcement, *enforcement* is coded 0.

The variable *dispute settlement* captures whether an institutional body exists in an IGO whose purpose is to settle disputes, differences, or misunderstandings among participants. These disputes can be about the implementation of rules or other commitments of the organization. They may also arise in the context of the internal operations of an IGO. *Dispute settlement* is coded 1 if dispute settlement is delegated to a body or procedure as part of the institutional structure of an IGO. If no institutionalized dispute settlement exists in an IGO, the variable is coded 0. If it lacks its own dispute settlement mechanism, an IGO may delegate dispute settlement to another institution (e.g. an international court). If an organization is founded with the purpose to settle disputes (e.g. among states or other actors) but has no internal dispute settlement procedures, then the variable is coded 0. The variable captures an aspect of the institutional structure of an IGO and not its governance function. Dispute settlement as governance function of an IGO is captured by our governance function variables.

The variable *decision-making* captures whether procedures for decision-making are specified in an IGO. It is coded 1 if such rules are explicitly specified as part of the institutional structure of an organization, and 0 otherwise. The variable captures decision-making procedures in general, not only voting in a narrower sense. If an IGO, for example, uses a consensus procedure and does not take votes, then as long as consensus decision-making is specified as decision-making procedure, *decision-making* is coded 1. In other words, the variable acknowledges the existence of decision-making rules as part of the institutional structure of an IGO but does not weigh up one decision-making rule against another.

**Table A2** Factor analysis of IGO design features

| <i>Panel A</i> |                   |                   |                   |                   |
|----------------|-------------------|-------------------|-------------------|-------------------|
| <b>Factor</b>  | <b>Eigenvalue</b> | <b>Difference</b> | <b>Proportion</b> | <b>Cumulative</b> |
| Factor1        | 1.462             | 1.253             | 1.185             | 1.185             |
| Factor2        | 0.209             | 0.209             | 0.170             | 1.355             |
| Factor3        | 0.0005            | 0.202             | 0.0004            | 1.355             |
| Factor4        | -0.202            | 0.034             | -0.164            | 1.192             |
| Factor5        | -0.236            | .                 | -0.192            | 1.000             |

  

| <i>Panel B</i>     |                |                   |
|--------------------|----------------|-------------------|
| <b>Variable</b>    | <b>Factor1</b> | <b>Uniqueness</b> |
| Secretariat        | 0.328          | 0.892             |
| Voting             | 0.595          | 0.646             |
| Monitoring         | 0.413          | 0.829             |
| Enforcement        | 0.609          | 0.629             |
| Dispute settlement | 0.677          | 0.541             |

*Notes:* Panel A shows that all design elements load onto a single latent factor (with Eigenvalue above one). Panel B shows that the factor loadings are all positive.

### Measuring IGO governance tasks

This section provides additional details about the coding of the eight governance task variables included in our data. The variable *agenda-setting* captures whether an IGO is involved in placing an issue or problem on the international agenda. Agenda-setting efforts can include campaigning to increase the awareness of specific target actors, such as governments or other IGOs, as well as the broader public for a given issue or problem. It can also include broader educational efforts to raise awareness of a particular target audience. Thus, awareness raising can be part of agenda-setting. This awareness raising can also take the form of movement building if the campaign for placing an issue on the international agenda involves the creation of a new transnational movement. IGOs that engage in lobbying governments or business to adopt a standard or practice also belong in this category. If an IGO is involved in agenda-setting, the variable *agenda-setting* is coded 1, and 0 otherwise.

The variable *standard-setting* captures whether the task of an IGO involves setting international rules, principles, or standards that aim at shaping the behavior of a target group, such as companies or states. These can be technical standards, codes of conduct, guidelines, or any other form of standard that is geared toward changing the behavior of some target audience. The design of principles to guide some actors' behavior is considered part of standard-setting. If an IGO is directly involved or participates in standard-setting or rule-making as one of its tasks, the variable *standard-setting* is coded 1, and 0 otherwise. If an IGO promotes only a particular type of policy, rule, or standard, or lobbies other actors to make or change rules and standards without being directly involved itself in the rule-making and standard-setting, *standard-setting* is coded 0.

The variable *implementation* captures whether the task of an IGO involves the implementation of existing rules or standards. The rules and standards which the IGO seeks to implement or assists in implementing can originate with the IGO itself or with another IGO, government, or other actor. Implementing IGOs are involved in the design and implementation of activities and programs that are geared toward implementing and ensuring compliance with some international rule or standard. If an IGO is concerned with the implementation of existing international rules, the variable *implementation* is coded 1, otherwise 0.

The variable *monitoring* captures whether the task of an IGO involves monitoring the implementation of international rules or standards or the behavior of specific actors. This is not necessarily the same as having monitoring as an institutional design element. Here, the question is whether the monitoring of the behavior of some actor or group of actors is among the tasks of the IGO. If an IGO conducts surveys to observe the behavior of particular target groups, this may be a case of monitoring. The variable *monitoring* is coded 1 if the task of an IGO involves monitoring, and 0 otherwise. If an IGO monitors only its own participants, we code this as 1. Monitoring in the sense of this variable does not include project monitoring or the assessment of the achievement of benchmarks, etc. We are only interested in the monitoring of behavior of some actors that is geared toward the detection of defection from some rule, standard, or norm.

The variable *funding* captures whether the task of an IGO involves the financing of projects and other activities. These projects and activities can be organized and managed by the IGO or any other actor. These projects and activities can generate material outputs, such as roads, wells or schools, or immaterial outputs, such as knowledge or research. To qualify as a funding IGO, the primary question is whether the IGO is involved in the funding of projects. This may take direct and indirect forms. The provision of funding for projects is an example of direct funding. It may also include indirect funding activities. This may include the garnering of funding or the goal to find new funding for particular issues without actually providing funds itself. Attracting, facilitating, and mobilizing new domestic and foreign investment to further a particular cause would be an example of this. Financing may take the form of one-off fundraising campaigns, sponsorship, donations, or permanent institutional support. We code resource mobilization IGOs as falling in the *funding* category unless the resource mobilization is geared toward a more specific end, such as agenda-setting or capacity-building. If an IGO is involved in the funding of projects and other activities, the variable *funding* is coded 1. If an IGO is not concerned with the funding of projects and other activities, *funding* is coded 0.

The variable *capacity-building* captures whether the task of an IGO involves capacity-building. This capacity-building can be concerned with any actor or group of actors (e.g. civil society organizations, minority groups, etc.). It can be capacity-building for governments in a particular part of the world or capacity-building of a specific group of people, among many others. IGOs that engage in technology transfer would fall into this category. Training in the form of programs that are intended to improve the performance of government officials, staff, or organizations, as well as individual people also constitutes capacity-building by an IGO. If an IGO funds capacity-building, this also constitutes capacity-building. If an IGO engages in capacity-building, *capacity-building* is coded 1, and 0 otherwise.

The variable *knowledge creation* captures whether an IGO is involved in the production of new knowledge and/or the dissemination of information. This includes the development of new thinking, research, expertise, ideas, and policies that are related to or concerned with transnational problems. Here, the question is whether an IGO creates new knowledge and ideas. If this is the case, *knowledge creation* is coded 1, and 0 otherwise. The variable also captures whether the task of an IGO involves the exchange, sharing, and dissemination of information and knowledge and networking among its participants as well as participants and actors that are not participating in the IGO. Bringing experts or people together to learn about a particular problem and creating a platform for the exchange and sharing of ideas and knowledge are all coded as a 1 on this variable. This includes the consolidation and dissemination of good practices, best practices, lessons learned, etc. It also includes the promotion of principles and standards. It can also involve the provision of advice or strategic guidance on a specific issue. It does not include technology transfer, which we code as capacity-building. The building and strengthening of partnerships is also part of the networking function of IGOs.

Finally, the variable *service provision* captures whether the task of an IGO involves the provision of a particular service. Service providing IGOs seek to fill operational gaps left by states and/or other IGOs by distributing resources and services in a particular area. The area might be the entire globe if an IGO does not operate with a specific geographic focus. A service providing IGO focuses on delivering a particular good, such as the collection of waste or the provision of drugs or vaccines. The services may take the form of collective or public goods, but this is not necessarily the case. The service may be provided to the members of the IGO or to a larger group. If an IGO is concerned with the provision of services, the variable *service provision* is coded 1, and 0 otherwise.

### **Measuring IGO issue areas**

To measure the issue areas of world politics in which IGOs are active, we start from the Correlates of War (COW) Project's IGO dataset (Pevehouse et al. 2020). The COW IGO dataset contains 22 indicator variables that capture whether a given IGO is active in one of the following areas: defense, trade, commerce, banking, monetary policy, food and agriculture, development, culture, labor, legal, education, transport, communication, sport, women, tourism, technical, science and technology, human rights, health, environment, and energy. We aggregate these 22 sub-issue areas into nine broader issue areas; namely, security, trade and commerce, finance, development, social affairs, technical, human rights, health, and environment. Table A1 shows how we aggregate the COW Project's issue area coding of IGOs. We use these aggregated issue areas to facilitate the comparison and integration of the COW IGO data with data on other types of global governance institutions, such as transnational public-private governance initiatives (Westerwinter 2021), which we will use in our robustness analyses.

**Figure A1** IGO design similarity across issue areas

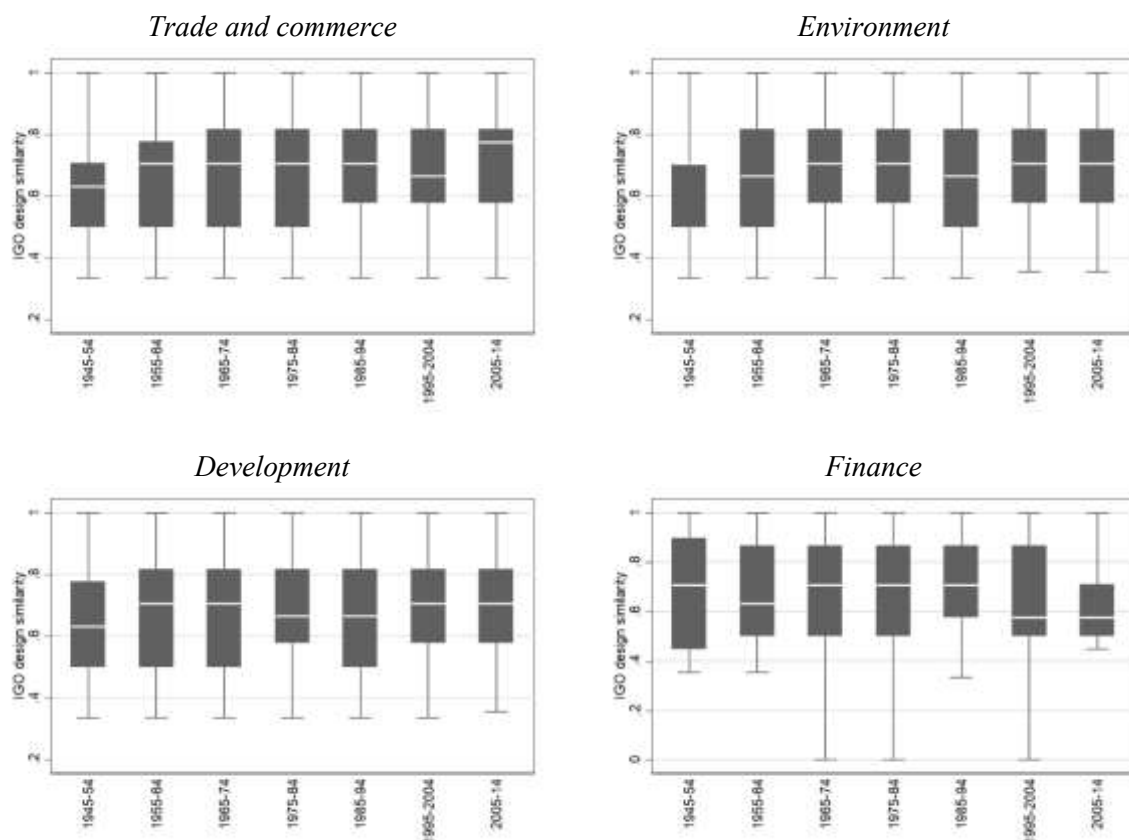

**Figure A2** IGO design similarity for regional IGOs and inter-continental IGOs

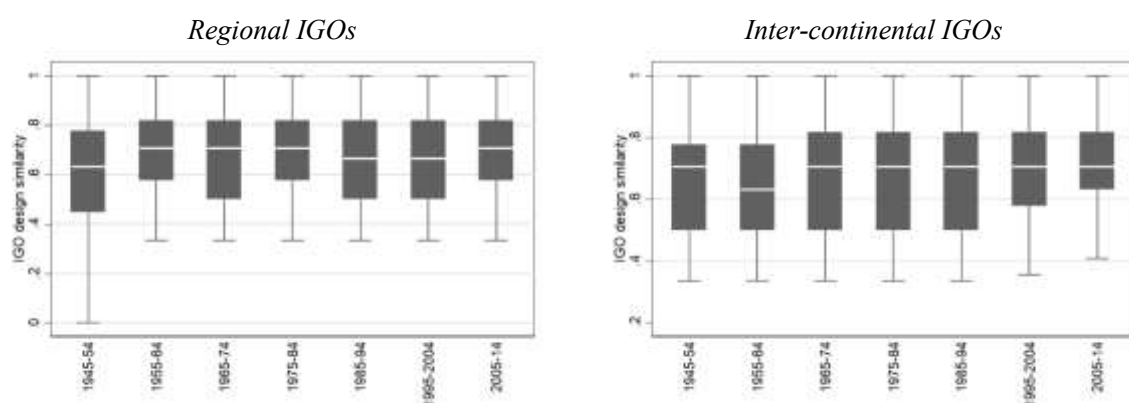

*Notes:* The left panel shows design similarity for new regional IGOs, separately for prior global IGOs (solid line) and regional IGOs (dashed line). The right panel shows the same but for new global IGOs.

**Figure A3** IGO design similarity for interventionist IGOs and non-interventionist IGOs

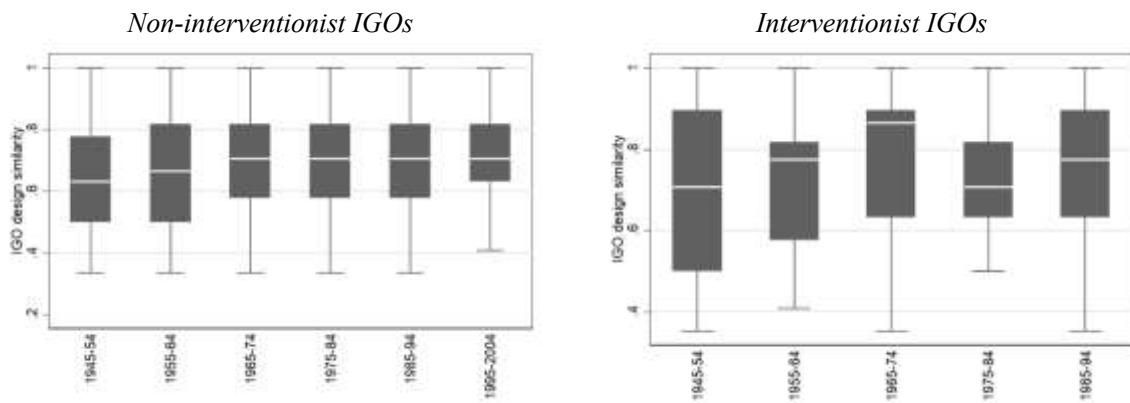

*Notes:* The left panel shows design similarity for new regional IGOs, separately for prior global IGOs (solid line) and regional IGOs (dashed line). The right panel shows the same but for new global IGOs.

**Figure A4** Average overlap across issue areas

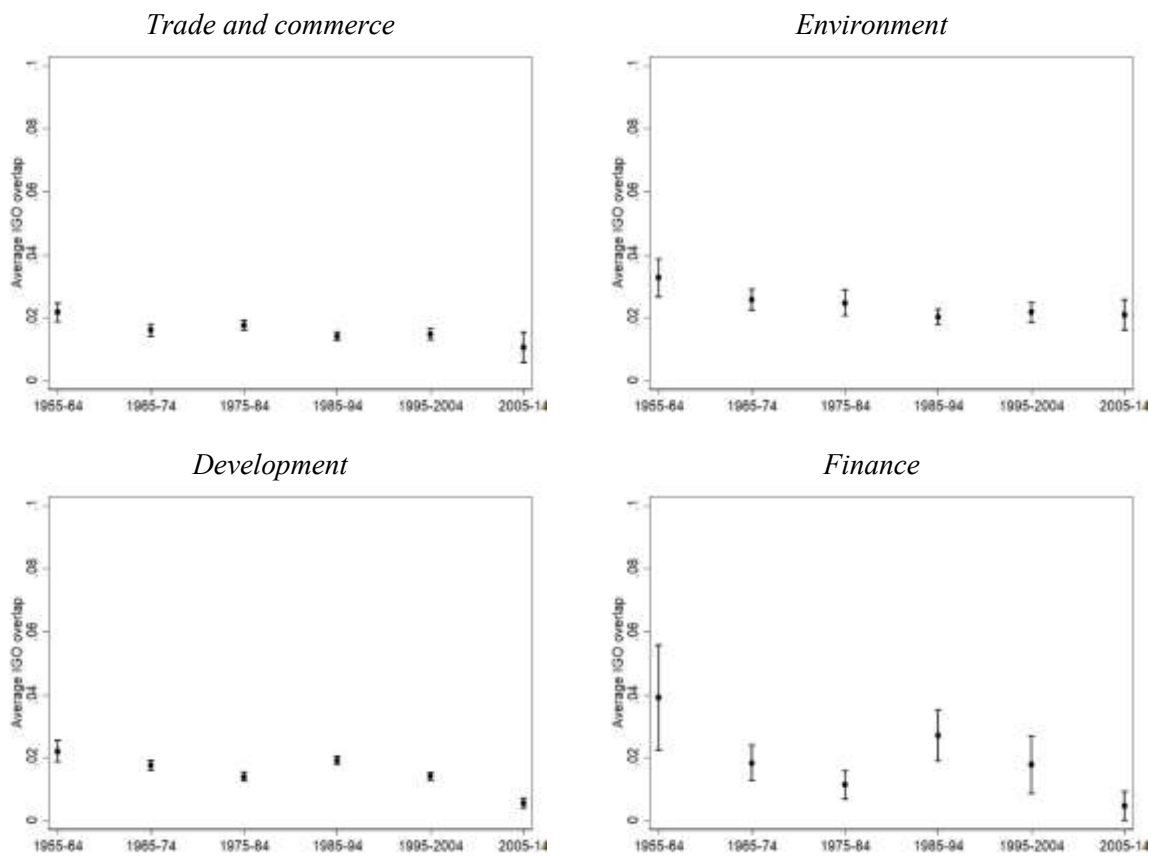

**Figure A5** Average overlap for regional IGOs and inter-continental IGOs

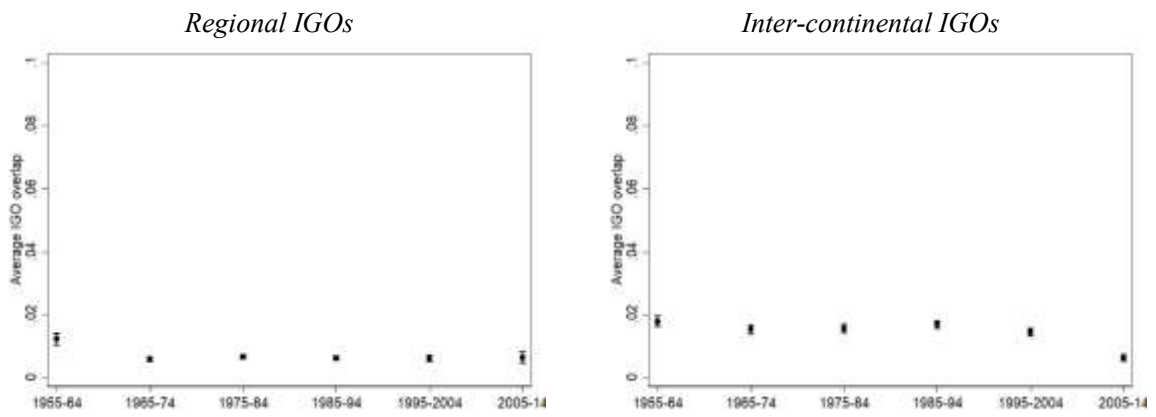

**Figure A6** Average overlap for interventionist IGOs and non-interventionist IGOs

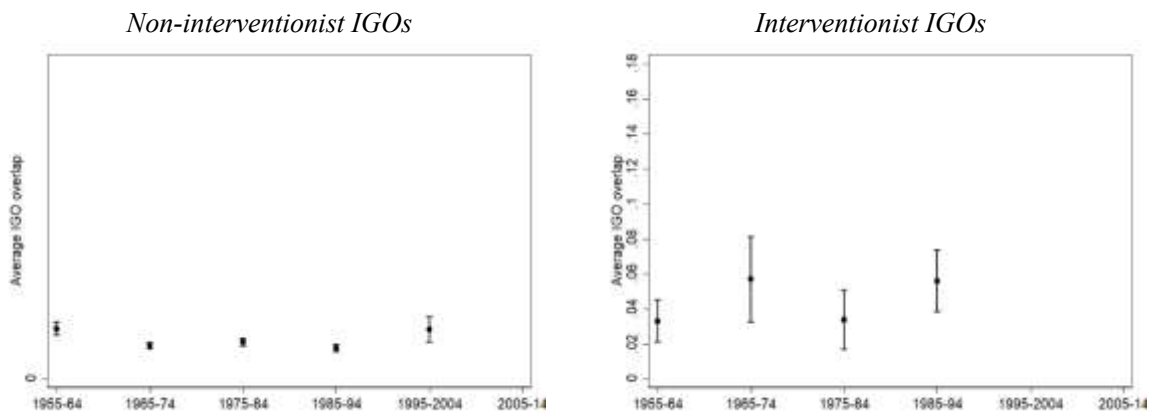



**Table A3** Correlation table: Membership, governance task, and issue area overlap

|          | $M_{ij}$ | $G_{ij}$ |
|----------|----------|----------|
| $G_{ij}$ | 0.0358   |          |
| $I_{ij}$ | -0.0018  | 0.0562   |

**Table A4** Factor analysis on the three overlap dimensions

| <i>Panel A</i> |            | <i>Panel B</i> |         |
|----------------|------------|----------------|---------|
| Factor         | Eigenvalue | Variable       | Factor1 |
| Factor1        | 0.069      | $M_{ij}$       | 0.095   |
| Factor2        | 0.004      | $G_{ij}$       | 0.189   |
| Factor3        | -0.064     | $I_{ij}$       | 0.158   |

*Note:* The factor analysis shows that there is no common latent factor (with Eigenvalue above one) for the three overlap dimensions.

**Figure A7** Correlation plot: Membership overlap and functional overlap

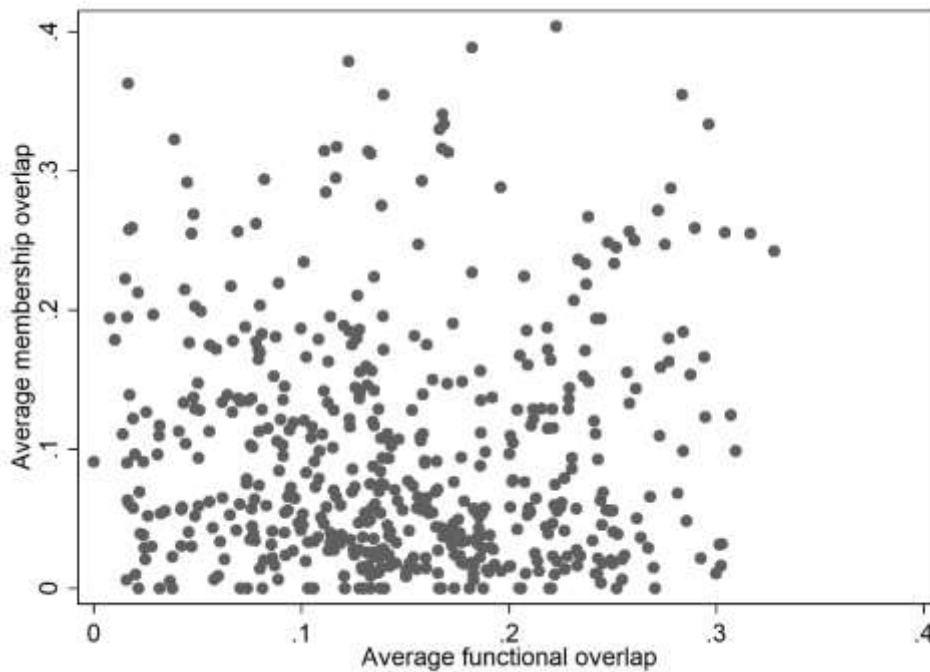

*Note:* Functional overlap is defined as the product between issue area and governance task overlap.

**Table A5** Top-twenty list of most-overlapping IGO pairs

| COWi | Label    | Name of IGO i                               | COWj | Label  | Name of IGO j                                            | MGI <sub>ij</sub> | M <sub>ij</sub> | G <sub>ij</sub> | I <sub>ij</sub> |
|------|----------|---------------------------------------------|------|--------|----------------------------------------------------------|-------------------|-----------------|-----------------|-----------------|
| 3630 | NDF      | Nordic Development Fund                     | 3650 | NIB    | Nordic Investment Bank                                   | 1.000             | 1.000           | 1.000           | 1.000           |
| 3585 | NVC      | Nordic Centre for Welfare and Social Issues | 1980 | GCRSNC | Guidance Comm. for Road Safety in Nordic Country         | 0.816             | 1.000           | 0.816           | 1.000           |
| 4520 | WNF      | West Nordic Fund                            | 3650 | NIB    | Nordic Investment Bank                                   | 0.816             | 1.000           | 1.000           | 0.816           |
| 3630 | NDF      | Nordic Development Fund                     | 4520 | WNF    | West Nordic Fund                                         | 0.816             | 1.000           | 1.000           | 0.816           |
| 3860 | OSPAR    | OSPAR Commission                            | 3910 | PC     | Paris Commission                                         | 0.800             | 0.800           | 1.000           | 1.000           |
| 125  | AMCOW    | African Ministers' Council on Water         | 1310 | CAMRSD | Conf. African Ministers for Sustain Development          | 0.786             | 0.962           | 0.816           | 1.000           |
| 3705 | NPAFC    | North Pacific Anadromous Fish Commission    | 2920 | INPFC  | International North Pacific Fisheries Commission         | 0.750             | 0.750           | 1.000           | 1.000           |
| 300  | BONN     | Bonn Agreement                              | 3910 | PC     | Paris Commission                                         | 0.745             | 0.833           | 0.894           | 1.000           |
| 3910 | PC       | Paris Commission                            | 3855 | OSLO   | Oslo Commission                                          | 0.715             | 0.923           | 0.775           | 1.000           |
| 980  | CAIPA    | Centr. Am. Instit. for Public Admin.        | 2070 | INCAP  | Instit Nutrition for Cent Am & Pan                       | 0.707             | 1.000           | 1.000           | 0.707           |
| 2130 | IACW     | Inter-American Commission of Women          | 2110 | IACI   | Inter-American Children's Institute                      | 0.688             | 0.769           | 0.894           | 1.000           |
| 1930 | SCHENGEN | Group of Schengen                           | 20   | ACSSRB | Administrative Center for Soc Security for Rhine Boatmen | 0.680             | 0.833           | 0.816           | 1.000           |
| 3860 | OSPAR    | OSPAR Commission                            | 3855 | OSLO   | Oslo Commission                                          | 0.671             | 0.867           | 0.775           | 1.000           |
| 380  | ABEDA    | Arab Bank for Econ. Dev. in Africa          | 420  | AFESD  | Arab Fund for Social/Economic Development                | 0.668             | 0.944           | 0.707           | 1.000           |
| 4270 | SAAFA    | Special Arab Aid Fund for Africa            | 420  | AFESD  | Arab Fund for Social/Economic Development                | 0.668             | 0.944           | 1.000           | 0.707           |
| 3100 | ISA      | Int'l Seabed Authority                      | 2830 | ILO    | Intl Labour Org                                          | 0.667             | 0.789           | 0.845           | 1.000           |
| 1820 | ETF      | European Training Foundation                | 1680 | EIPA   | Europ. Institute of Public Admin.                        | 0.667             | 1.000           | 0.667           | 1.000           |
| 3100 | ISA      | Int'l Seabed Authority                      | 2500 | ICAO   | Intl Civil Aviation Org                                  | 0.650             | 0.758           | 0.857           | 1.000           |
| 3540 | MIGA     | Multilateral Investment Guarantee Agency    | 2400 | IBRD   | World Bank                                               | 0.647             | 0.792           | 0.816           | 1.000           |
| 1790 | ESA      | European Space Agency                       | 1800 | ESRO   | Euro Space Research Org                                  | 0.636             | 0.900           | 0.707           | 1.000           |

**Figure A8** Development of common memberships, governance task portfolios, and issue area portfolios, 1815-2014

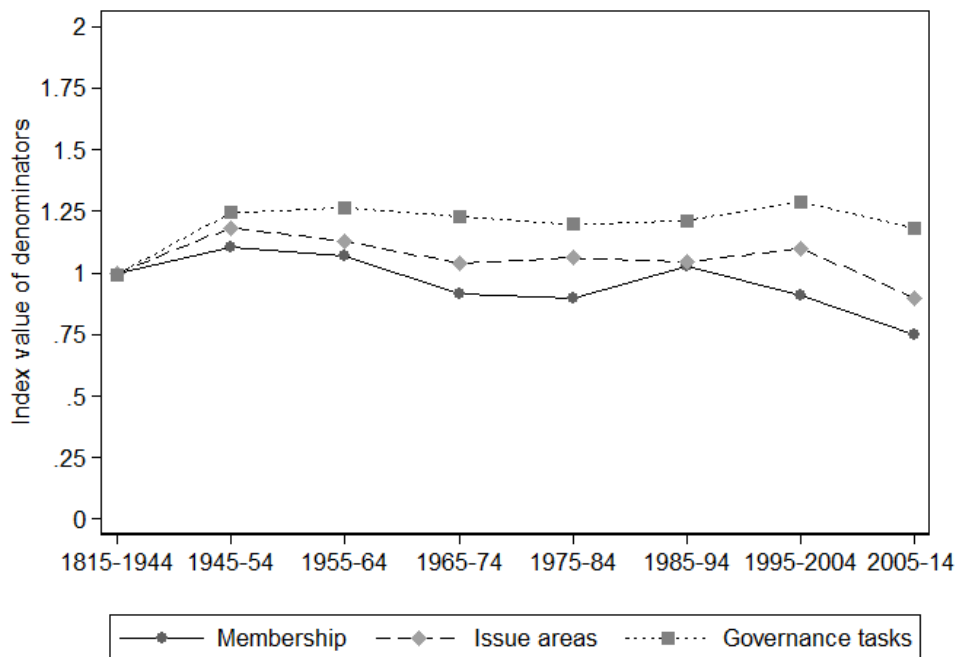

*Note:* (Common) membership refers to the number of unique members in both organizations. For issue areas and governance tasks, we use the denominators of the cosine similarities. To make the measures scale-invariant, we express them in relative terms with respect to their values in the first period.

**Table A6** Dependent and independent variables: Definition and descriptive statistics

| Variable name           | Technical definition                                                                                                                                                                                | Obs.    | Mean  | Std. dev. | Min. | Max. |
|-------------------------|-----------------------------------------------------------------------------------------------------------------------------------------------------------------------------------------------------|---------|-------|-----------|------|------|
| <i>Outcome measure</i>  |                                                                                                                                                                                                     |         |       |           |      |      |
| IGO design similarity   | Cosine similarity of two design profiles between an IGO $i$ and a pre-existing IGO $j$ ; a design profile is a five-dimensional vector of design elements                                           | 111,630 | 0.665 | 0.229     | 0    | 1    |
| <i>Overlap measures</i> |                                                                                                                                                                                                     |         |       |           |      |      |
| Membership overlap      | Membership overlap of an IGO $i$ and a pre-existing IGO $j$ , computed as the number of states that are members in both IGOs, divided by the number of (unique) members in both IGOs                | 140,202 | 0.065 | 0.120     | 0    | 1    |
| Governance task overlap | Task overlap of an IGO $i$ and a pre-existing IGO $j$ , computed as the cosine similarity of the governance task profiles of both IGOs; a governance task profile is an eight-tuple of binary tasks | 136,419 | 0.511 | 0.253     | 0    | 1    |
| Issue area overlap      | Issue area overlap of an IGO $i$ with a pre-existing IGO $j$ , computed as the cosine similarity of the issue area profiles of both IGOs; an issue profile is a nine-tuple of binary issue areas    | 137,443 | 0.276 | 0.334     | 0    | 1    |
| Overlap                 | Overlap of an IGO $i$ and a pre-existing IGO $j$ , computed as the product of membership overlap, governance task overlap, and issue area overlap, as defined above                                 | 132,934 | 0.010 | 0.036     | 0    | 1    |

**Table A7** Summary statistics of dyadic data

|                                       | Obs.    | Mean     | Std. Dev. | Min.   | Max.  |
|---------------------------------------|---------|----------|-----------|--------|-------|
| <i>Dependent variables</i>            |         |          |           |        |       |
| IGO design similarity                 | 111,630 | 0.665    | 0.229     | 0.000  | 1.000 |
| ... without decision-making           | 103,811 | 0.721    | 0.227     | 0.000  | 1.000 |
| ... alternative decision-making       | 59,347  | 0.636    | 0.214     | 0.000  | 1.000 |
| ... without monitoring                | 110,688 | 0.712    | 0.228     | 0.000  | 1.000 |
| IGO design similarity (Jaccard index) | 140,603 | 0.632    | 0.241     | 0.000  | 1.000 |
| <i>Key predictors</i>                 |         |          |           |        |       |
| Membership overlap                    | 140,202 | 0.065    | 0.120     | 0.000  | 1.000 |
| Governance task overlap               | 136,419 | 0.511    | 0.253     | 0.000  | 1.000 |
| Issue area overlap                    | 137,443 | 0.276    | 0.334     | 0.000  | 1.000 |
| Overlap                               | 132,934 | 0.010    | 0.036     | 0.000  | 1.000 |
| Overlap (shared issue area)           | 59,853  | 0.035    | 0.075     | 0.000  | 1.000 |
| Overlap (using major powers)          | 133,307 | 0.084    | 0.362     | 0.000  | 8.000 |
| <i>Control variables</i>              |         |          |           |        |       |
| Number of shared issue areas          | 140,603 | 0.518    | 0.657     | 0.000  | 7.000 |
| Shared region                         | 140,603 | 0.280    | 0.449     | 0.000  | 1.000 |
| Number of member states               | 140,603 | 2.618    | 1.154     | 0.000  | 5.268 |
| States in system                      | 140,603 | 4.989    | 0.306     | 3.434  | 5.278 |
| Founding year                         | 140,603 | 1979.626 | 18.821    | 1838   | 2014  |
| Number of major powers                | 122,237 | 1.932    | 2.002     | 0.000  | 9.000 |
| Number of member states               | 140,603 | 2.788    | 1.235     | 0.000  | 5.268 |
| Difference in major powers            | 97,694  | -0.738   | 2.680     | -9.000 | 9.000 |
| Difference in ideal points            | 57,015  | -0.420   | 1.240     | -4.988 | 5.303 |
| Security                              | 140,603 | 0.063    | 0.244     | 0.000  | 1.000 |
| Environment                           | 140,603 | 0.224    | 0.417     | 0.000  | 1.000 |
| Health                                | 140,603 | 0.065    | 0.247     | 0.000  | 1.000 |
| Human rights                          | 140,603 | 0.036    | 0.187     | 0.000  | 1.000 |
| Trade and commerce                    | 140,603 | 0.320    | 0.466     | 0.000  | 1.000 |
| Finance                               | 140,603 | 0.128    | 0.334     | 0.000  | 1.000 |
| Development                           | 140,603 | 0.424    | 0.494     | 0.000  | 1.000 |
| Social affairs                        | 140,603 | 0.385    | 0.486     | 0.000  | 1.000 |
| Technical issues                      | 140,603 | 0.238    | 0.426     | 0.000  | 1.000 |
| Norm-setting                          | 138,713 | 0.346    | 0.476     | 0.000  | 1.000 |
| Implementation                        | 138,713 | 0.343    | 0.475     | 0.000  | 1.000 |
| Monitoring                            | 138,713 | 0.230    | 0.421     | 0.000  | 1.000 |
| Funding                               | 138,713 | 0.230    | 0.421     | 0.000  | 1.000 |
| Capacity-building                     | 138,713 | 0.301    | 0.459     | 0.000  | 1.000 |
| Service provision                     | 138,713 | 0.597    | 0.490     | 0.000  | 1.000 |
| Agenda-setting                        | 140,603 | 0.544    | 0.498     | 0.000  | 1.000 |
| Information provision                 | 140,603 | 0.826    | 0.379     | 0.000  | 1.000 |
| <i>Other variables</i>                |         |          |           |        |       |
| Successful pre-existing IGO           | 140,603 | 0.704    | 0.456     | 0.000  | 1.000 |
| Progeny                               | 140,603 | 0.0006   | 0.024     | 0.000  | 1.000 |
| Regime heterogeneity                  | 135,187 | 0.754    | 0.179     | 0.438  | 0.988 |
| Global organization                   | 140,603 | 0.358    | 0.479     | 0.000  | 1.000 |
| Mandate ambiguity                     | 140,603 | 0.423    | 0.494     | 0.000  | 1.000 |

|                      |         |       |       |       |       |
|----------------------|---------|-------|-------|-------|-------|
| Any G7 member        | 140,603 | 0.371 | 0.483 | 0.000 | 1.000 |
| Post-Cold War        | 140,603 | 0.340 | 0.474 | 0.000 | 1.000 |
| COW coding ambiguity | 140,603 | 0.248 | 0.432 | 0.000 | 1.000 |

---

**Figure A9** Verifying the distributional assumptions of linear regression

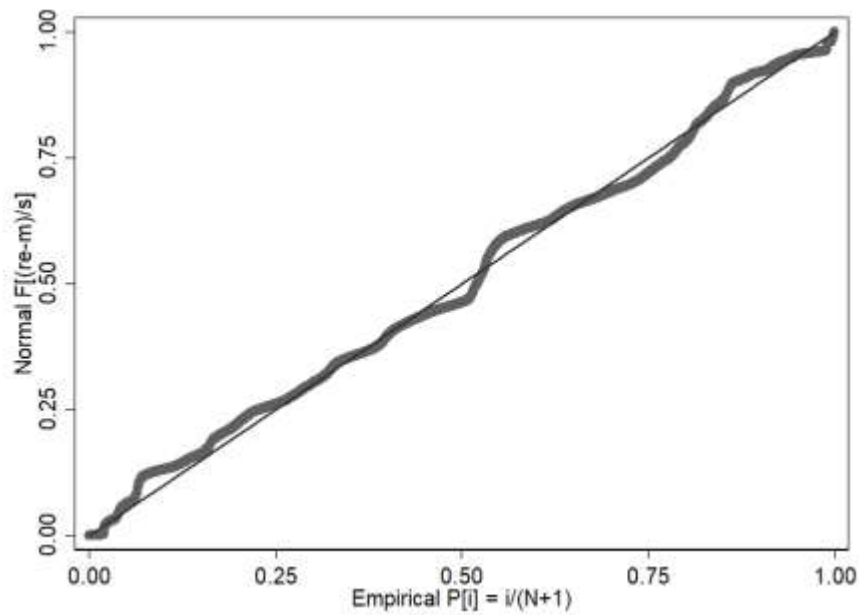

*Notes:* To verify that distributional assumptions of OLS are met, we obtain the residuals from Model 3 in Table 1 and plot them against the normal distribution. To produce the figure, we sort the residuals and plot the quantile values against the normal density. A 45-degree line would indicate a perfect normal distribution. We find that the empirical distribution of the residuals well approximates this 45-degree line, suggesting that our regressions fulfil the assumptions of the Gauss-Markov theorem.

**Table A8** Determinants of IGO design similarity separately for successful and unsuccessful pre-existing IGOs

|                                            | Successful pre-existing IGOs |                      |                      | Unsuccessful pre-existing IGOs |                      |                      |
|--------------------------------------------|------------------------------|----------------------|----------------------|--------------------------------|----------------------|----------------------|
|                                            | (1)                          | (2)                  | (3)                  | (4)                            | (5)                  | (6)                  |
| Overlap <sub>ij</sub>                      | 0.121***<br>(0.025)          | 0.126***<br>(0.027)  | 0.087*<br>(0.034)    | 0.112°<br>(0.067)              | 0.111°<br>(0.065)    | -0.031<br>(0.091)    |
| Number of shared issue areas <sub>ij</sub> | 0.005***<br>(0.001)          | 0.003°<br>(0.002)    | 0.005*<br>(0.002)    | 0.003<br>(0.003)               | 0.005°<br>(0.003)    | 0.010<br>(0.006)     |
| Shared region <sub>ij</sub>                | -0.001<br>(0.003)            | 0.004<br>(0.003)     | 0.002<br>(0.003)     | 0.005<br>(0.004)               | 0.004<br>(0.004)     | 0.010<br>(0.008)     |
| Start year <sub>j</sub>                    |                              | -0.002***<br>(0.000) | -0.001***<br>(0.000) |                                | -0.001***<br>(0.000) | -0.001***<br>(0.000) |
| Number of major powers <sub>j</sub>        |                              | -0.003***<br>(0.000) | -0.004***<br>(0.001) |                                | 0.003***<br>(0.001)  | 0.031***<br>(0.003)  |
| Number of member states <sub>j</sub>       |                              | 0.001<br>(0.001)     | 0.004*<br>(0.002)    |                                | -0.018***<br>(0.001) | 0.001<br>(0.002)     |
| Difference in major powers <sub>ij</sub>   |                              |                      | -0.003***<br>(0.000) |                                |                      | 0.012***<br>(0.001)  |
| Difference in ideal points <sub>ij</sub>   |                              |                      | 0.001<br>(0.001)     |                                |                      | -0.019***<br>(0.004) |
| Fixed effects                              | Yes                          | Yes                  | Yes                  | Yes                            | Yes                  | Yes                  |
| Time period dummies                        | Yes                          | Yes                  | Yes                  | Yes                            | Yes                  | Yes                  |
| Observations                               | 90968                        | 76295                | 42101                | 16659                          | 16070                | 4682                 |
| Within-R2                                  | 0.153                        | 0.153                | 0.146                | 0.314                          | 0.317                | 0.178                |

*Notes:* Linear regression with fixed effects on IGO  $i$ . Robust standard errors clustered on IGO  $i$  in parentheses. “Success” is defined as survival of IGO  $j$  up until the year in which IGO  $i$  was created, which allows for cases of IGO mergers and IGO replacements. Significance levels: °  $p < .1$  \*  $p < .05$  \*\*  $p < .01$  \*\*\*  $p < .001$ .



**Table A9** Determinants of IGO design similarity using issue-area specific models

|                                            | Trade and commerce<br>(1) |         | Environment<br>(2) |         | Finance<br>(3) |         | Development<br>(4) |         |
|--------------------------------------------|---------------------------|---------|--------------------|---------|----------------|---------|--------------------|---------|
| <i>IGO design similarity</i>               |                           |         |                    |         |                |         |                    |         |
| Overlap <sub>ij</sub>                      | 0.092°                    | (0.053) | 0.119*             | (0.053) | 0.040          | (0.074) | 0.109**            | (0.042) |
| Number of shared issue areas <sub>ij</sub> | 0.012***                  | (0.002) | 0.006*             | (0.003) | 0.015***       | (0.004) | 0.010***           | (0.002) |
| Shared region <sub>ij</sub>                | -0.003                    | (0.004) | 0.005              | (0.005) | 0.004          | (0.007) | -0.001             | (0.003) |
| 1945-54                                    |                           |         |                    |         |                |         |                    |         |
| 1955-64                                    | -0.184**                  | (0.069) | 0.224**            | (0.079) | -0.168*        | (0.066) | -0.014             | (0.079) |
| 1965-74                                    | -0.073                    | (0.054) | 0.071              | (0.047) | -0.180**       | (0.064) | -0.071             | (0.056) |
| 1975-84                                    | -0.032                    | (0.043) | 0.062°             | (0.036) | -0.025         | (0.038) | -0.120**           | (0.045) |
| 1985-94                                    | 0.005                     | (0.027) | -0.011             | (0.023) | -0.055*        | (0.026) | -0.059°            | (0.032) |
| 1995-2004                                  | -0.021                    | (0.020) | -0.022             | (0.014) | -0.036°        | (0.020) | -0.076***          | (0.020) |
| 2005-14                                    |                           |         |                    |         |                |         |                    |         |
| Start year <sub>j</sub>                    | -0.002                    | (0.001) | 0.002*             | (0.001) | -0.003**       | (0.001) | -0.001             | (0.001) |
| Number of major powers <sub>j</sub>        | 0.001                     | (0.002) | 0.001              | (0.002) | 0.015***       | (0.005) | -0.002             | (0.003) |
| Number of member states <sub>j</sub>       | 0.004**                   | (0.001) | 0.002              | (0.002) | 0.013***       | (0.002) | 0.002°             | (0.001) |
| Difference in major powers <sub>ij</sub>   | -0.001                    | (0.002) | -0.001             | (0.002) | 0.018***       | (0.004) | -0.003             | (0.003) |
| Difference in ideal points <sub>ij</sub>   | -0.004*                   | (0.002) | -0.001             | (0.002) | -0.006*        | (0.003) | -0.002             | (0.001) |
| Fixed effects                              | Yes                       |         | Yes                |         | Yes            |         | Yes                |         |
| Observations                               | 16206                     |         | 10932              |         | 7024           |         | 21627              |         |
| Within-R2                                  | 0.104                     |         | 0.147              |         | 0.134          |         | 0.114              |         |

Notes: Ordinary Least Squares regression with fixed effects and clustered standard errors on organizations. Significance levels: ° p<.1 \* p<.05 \*\* p<.01 \*\*\* p<.001.

**Table A10** Determinants of IGO design similarity using a disaggregated overlap measure and issue area-specific models

|                                            | Trade and commerce |         | Environment |         | Finance  |         | Development |         |
|--------------------------------------------|--------------------|---------|-------------|---------|----------|---------|-------------|---------|
|                                            | (1)                |         | (2)         |         | (3)      |         | (4)         |         |
| <i>IGO design similarity</i>               |                    |         |             |         |          |         |             |         |
| Membership overlap <sub>ij</sub>           | 0.021              | (0.017) | 0.038*      | (0.018) | -0.026   | (0.024) | 0.010       | (0.014) |
| Functional overlap <sub>ij</sub>           | 0.057***           | (0.013) | 0.065***    | (0.015) | 0.105*** | (0.023) | 0.078***    | (0.011) |
| Number of shared issue areas <sub>ij</sub> | 0.001              | (0.004) | -0.005      | (0.004) | -0.006   | (0.006) | -0.006°     | (0.003) |
| Shared region <sub>ij</sub>                | -0.004             | (0.004) | 0.003       | (0.005) | 0.007    | (0.007) | -0.000      | (0.004) |
| 1945-54                                    |                    |         |             |         |          |         |             |         |
| 1955-64                                    | -0.181**           | (0.069) | 0.225**     | (0.079) | 0.113°   | (0.058) | -0.019      | (0.079) |
| 1965-74                                    | -0.071             | (0.054) | 0.071       | (0.047) | -0.010   | (0.044) | -0.072      | (0.056) |
| 1975-84                                    | -0.031             | (0.043) | 0.063°      | (0.036) | 0.096*** | (0.022) | -0.112*     | (0.045) |
| 1985-94                                    | 0.004              | (0.027) | -0.005      | (0.023) | 0.025    | (0.028) | -0.052      | (0.032) |
| 1995-2004                                  | -0.018             | (0.020) | -0.022      | (0.014) | -0.003   | (0.017) | -0.070***   | (0.020) |
| 2005-14                                    |                    |         |             |         |          |         |             |         |
| Start year <sub>j</sub>                    | -0.002             | (0.001) | 0.002*      | (0.001) | 0.001    | (0.000) | -0.001      | (0.001) |
| Number of major powers <sub>j</sub>        | 0.001              | (0.002) | 0.000       | (0.002) | 0.009    | (0.006) | -0.002      | (0.003) |
| Number of member states <sub>j</sub>       | 0.004**            | (0.001) | 0.002       | (0.002) | 0.013*** | (0.002) | 0.002°      | (0.001) |
| Difference in major powers <sub>ij</sub>   | -0.001             | (0.002) | -0.001      | (0.002) | 0.012*   | (0.006) | -0.003      | (0.003) |
| Difference in ideal points <sub>ij</sub>   | -0.004*            | (0.002) | -0.000      | (0.002) | -0.007*  | (0.003) | -0.002      | (0.001) |
| Fixed effects                              | Yes                |         | Yes         |         | Yes      |         | Yes         |         |
| Observations                               | 16206              |         | 10932       |         | 7024     |         | 21627       |         |
| Within-R2                                  | 0.105              |         | 0.148       |         | 0.137    |         | 0.115       |         |

Notes: Ordinary Least Squares regression with fixed effects and clustered standard errors on organizations. Significance levels: ° p<.1 \* p<.05 \*\* p<.01 \*\*\* p<.001.

**Table A11** Determinants of IGO design similarity using alternative overlap measure

|                                            | (1)                 | (2)                  | (3)                  |
|--------------------------------------------|---------------------|----------------------|----------------------|
| <i>IGO design similarity</i>               |                     |                      |                      |
| Overlap (shared issue area) <sub>ij</sub>  | 0.094***<br>(0.019) | 0.115***<br>(0.020)  | 0.076**<br>(0.023)   |
| Number of shared issue areas <sub>ij</sub> | 0.008*<br>(0.003)   | 0.008*<br>(0.003)    | 0.012*<br>(0.002)    |
| Shared region <sub>ij</sub>                | -0.002<br>(0.003)   | 0.001<br>(0.003)     | 0.003<br>(0.005)     |
| Start year <sub>j</sub>                    |                     | 0.001***<br>(0.000)  | -0.003***<br>(0.004) |
| Number of major powers <sub>j</sub>        |                     | -0.000<br>(0.001)    | 0.091***<br>(0.101)  |
| Number of member states <sub>j</sub>       |                     | -0.006***<br>(0.001) | 0.001<br>(0.010)     |
| Difference in major powers <sub>ij</sub>   |                     |                      | 0.092***<br>(0.002)  |
| Difference in ideal points <sub>ij</sub>   |                     |                      | 0.002<br>(0.001)     |
| Fixed effects                              | Yes                 | Yes                  | Yes                  |
| Time period dummies                        | Yes                 | Yes                  | Yes                  |
| Observations                               | 49488               | 42312                | 22782                |
| Within-R2                                  | 0.137               | 0.136                | 0.125                |

Notes: Ordinary Least Squares regression with fixed effects and clustered standard errors on organizations. Significance levels: ° p<.1 \* p<.05 \*\* p<.01 \*\*\* p<.001.

**Table A12** Determinants of IGO design similarity using alternative overlap measure with major powers overlap

|                                            | (1)      |         | (2)       |         | (3)       |         |
|--------------------------------------------|----------|---------|-----------|---------|-----------|---------|
| <i>IGO design similarity</i>               |          |         |           |         |           |         |
| Overlap <sub>ij</sub> *                    | 0.006*   | (0.002) | 0.008***  | (0.002) | 0.009*    | (0.003) |
| Number of shared issue areas <sub>ij</sub> | 0.006*** | (0.001) | 0.005**   | (0.002) | 0.006**   | (0.002) |
| Shared region <sub>ij</sub>                | 0.000    | (0.002) | 0.004     | (0.002) | 0.003     | (0.003) |
| Start year <sub>j</sub>                    |          |         | -0.002*** | (0.000) | -0.001*** | (0.000) |
| Number of major powers <sub>j</sub>        |          |         | -0.001°   | (0.000) | 0.003***  | (0.001) |
| Number of member states <sub>j</sub>       |          |         | -0.002°   | (0.001) | 0.003     | (0.002) |
| Difference in major powers <sub>ij</sub>   |          |         |           |         | 0.002***  | (0.000) |
| Difference in ideal points <sub>ij</sub>   |          |         |           |         | -0.001    | (0.001) |
| Fixed effects                              | Yes      |         | Yes       |         | Yes       |         |
| Time period dummies                        | Yes      |         | Yes       |         | Yes       |         |
| Observations                               | 107899   |         | 92407     |         | 46789     |         |
| Within-R2                                  | 0.159    |         | 0.160     |         | 0.142     |         |

*Notes:* Linear regression with fixed effects on IGO  $i$ . Robust standard errors clustered on IGO  $i$  in parentheses. Significance levels: °  $p < .1$  \*  $p < .05$  \*\*  $p < .01$  \*\*\*  $p < 0.001$ .

**Table A13** Determinants of IGO design similarity using logged overlap measure

|                                            | (1)      |         | (2)       |         | (3)       |         |
|--------------------------------------------|----------|---------|-----------|---------|-----------|---------|
| <i>IGO design similarity</i>               |          |         |           |         |           |         |
| Log(1+overlap <sub>ij</sub> )              | 0.118*** | (0.025) | 0.124***  | (0.026) | 0.079*    | (0.033) |
| Number of shared issue areas <sub>ij</sub> | 0.005*** | (0.001) | 0.004*    | (0.002) | 0.005*    | (0.002) |
| Shared region <sub>ij</sub>                | -0.001   | (0.002) | 0.002     | (0.002) | 0.002     | (0.003) |
| Start year <sub>j</sub>                    |          |         | -0.002*** | (0.000) | -0.001*** | (0.000) |
| Number of major powers <sub>j</sub>        |          |         | -0.001    | (0.000) | 0.003***  | (0.001) |
| Number of member states <sub>j</sub>       |          |         | -0.002°   | (0.001) | 0.003     | (0.002) |
| Difference in major powers <sub>ij</sub>   |          |         |           |         | 0.003***  | (0.000) |
| Difference in ideal points <sub>ij</sub>   |          |         |           |         | -0.001    | (0.001) |
| Fixed effects                              | Yes      |         | Yes       |         | Yes       |         |
| Time period dummies                        | Yes      |         | Yes       |         | Yes       |         |
| Observations                               | 107627   |         | 92365     |         | 46783     |         |
| Within-R2                                  | 0.159    |         | 0.160     |         | 0.142     |         |

Notes: Linear regression with fixed effects on IGO *i*. Robust standard errors clustered on IGO *i* in parentheses. Significance levels: ° p<.1 \* p<.05 \*\* p<.01 \*\*\* p<0.001.

**Table A14** Determinants of IGO design similarity using overlap dimensions

|                                            | (1)                 | (2)                  | (3)                  |
|--------------------------------------------|---------------------|----------------------|----------------------|
| <i>IGO design similarity</i>               |                     |                      |                      |
| Overlap <sub>ij</sub>                      | 0.116***<br>(0.027) | 0.129***<br>(0.028)  | 0.095**<br>(0.036)   |
| Membership overlap <sub>ij</sub>           | 0.011<br>(0.010)    | 0.010<br>(0.010)     | 0.001<br>(0.013)     |
| Issue area overlap <sub>ij</sub>           | -0.019**<br>(0.006) | -0.024***<br>(0.006) | -0.024*<br>(0.009)   |
| Number of shared issue areas <sub>ij</sub> | 0.014***<br>(0.003) | 0.015***<br>(0.004)  | 0.015**<br>(0.005)   |
| Shared region <sub>ij</sub>                | -0.002<br>(0.002)   | 0.002<br>(0.002)     | 0.002<br>(0.003)     |
| Start year <sub>j</sub>                    |                     | -0.002***<br>(0.000) | -0.002***<br>(0.000) |
| Number of major powers <sub>j</sub>        |                     | -0.001<br>(0.000)    | 0.004***<br>(0.001)  |
| Number of member states <sub>j</sub>       |                     | -0.003°<br>(0.001)   | 0.003<br>(0.002)     |
| Difference in major powers <sub>ij</sub>   |                     |                      | 0.003***<br>(0.000)  |
| Difference in ideal points <sub>ij</sub>   |                     |                      | -0.001<br>(0.001)    |
| Fixed effects                              | Yes                 | Yes                  | Yes                  |
| Time period dummies                        | Yes                 | Yes                  | Yes                  |
| Observations                               | 107627              | 92365                | 46783                |
| Within-R2                                  | 0.159               | 0.160                | 0.142                |

*Notes:* Linear regression with fixed effects on IGO  $i$ . Robust standard errors clustered on IGO  $i$  in parentheses. Significance levels: °  $p < .1$  \*  $p < .05$  \*\*  $p < .01$  \*\*\*  $p < 0.001$ .

**Table A15** Determinants of IGO design similarity using dependent variable without decision-making design component

|                                            | (1)    |         | (2)       |         | (3)       |         |
|--------------------------------------------|--------|---------|-----------|---------|-----------|---------|
| <i>IGO design similarity</i>               |        |         |           |         |           |         |
| Overlap <sub>ij</sub>                      | 0.070* | (0.029) | 0.091**   | (0.031) | 0.046     | (0.033) |
| Number of shared issue areas <sub>ij</sub> | 0.002  | (0.002) | 0.002     | (0.002) | 0.002     | (0.002) |
| Shared region <sub>ij</sub>                | 0.001  | (0.003) | 0.004     | (0.003) | 0.009*    | (0.004) |
| Start year <sub>j</sub>                    |        |         | -0.002*** | (0.000) | -0.003*** | (0.000) |
| Number of major powers <sub>j</sub>        |        |         | 0.002***  | (0.001) | 0.002*    | (0.001) |
| Number of member states <sub>j</sub>       |        |         | -0.012*** | (0.001) | -0.004*   | (0.002) |
| Difference in major powers <sub>ij</sub>   |        |         |           |         | -0.001**  | (0.000) |
| Difference in ideal points <sub>ij</sub>   |        |         |           |         | 0.009***  | (0.001) |
| Fixed effects                              | Yes    |         | Yes       |         | Yes       |         |
| Time period dummies                        | Yes    |         | Yes       |         | Yes       |         |
| Observations                               | 100385 |         | 85889     |         | 43219     |         |
| Within-R2                                  | 0.216  |         | 0.220     |         | 0.161     |         |

Notes: Ordinary Least Squares regression with fixed effects and clustered standard errors on organizations. Significance levels: ° p<.1 \* p<.05 \*\* p<.01 \*\*\* p<.001.

**Table A16** Determinants of IGO design similarity using dependent variable with majoritarian decision-making design component

|                                            | (1)                 | (2)                  | (3)                  |
|--------------------------------------------|---------------------|----------------------|----------------------|
| <i>IGO design similarity</i>               |                     |                      |                      |
| Overlap <sub>ij</sub>                      | 0.155***<br>(0.043) | 0.130**<br>(0.042)   | 0.066<br>(0.049)     |
| Number of shared issue areas <sub>ij</sub> | 0.011***<br>(0.002) | 0.009***<br>(0.002)  | 0.012***<br>(0.003)  |
| Shared region <sub>ij</sub>                | -0.001<br>(0.003)   | 0.002<br>(0.004)     | 0.009°<br>(0.005)    |
| Start year <sub>j</sub>                    |                     | 0.002***<br>(0.000)  | -0.002***<br>(0.000) |
| Number of major powers <sub>j</sub>        |                     | -0.005***<br>(0.001) | -0.004***<br>(0.001) |
| Number of member states <sub>j</sub>       |                     | 0.009***<br>(0.002)  | 0.017***<br>(0.003)  |
| Difference in major powers <sub>ij</sub>   |                     |                      | -0.004***<br>(0.000) |
| Difference in ideal points <sub>ij</sub>   |                     |                      | -0.000<br>(0.001)    |
| Fixed effects                              | Yes                 | Yes                  | Yes                  |
| Time period dummies                        | Yes                 | Yes                  | Yes                  |
| Observations                               | 58342               | 50285                | 27151                |
| Within-R2                                  | 0.163               | 0.166                | 0.124                |

Notes: Ordinary Least Squares regression with fixed effects and clustered standard errors on organizations. Significance levels: ° p<.1 \* p<.05 \*\* p<.01 \*\*\* p<.001.



**Table A17** Determinants of IGO design similarity using alternative dependent variable without monitoring design component

|                                            | (1)      |         | (2)       |         | (3)       |         |
|--------------------------------------------|----------|---------|-----------|---------|-----------|---------|
| <i>IGO design similarity</i>               |          |         |           |         |           |         |
| Overlap <sub>ij</sub>                      | 0.094*** | (0.024) | 0.099***  | (0.024) | 0.071*    | (0.034) |
| Number of shared issue areas <sub>ij</sub> | 0.004*** | (0.001) | 0.005***  | (0.001) | 0.005***  | (0.001) |
| Shared region <sub>ij</sub>                | -0.000   | (0.002) | 0.002     | (0.002) | 0.002     | (0.003) |
| Start year <sub>j</sub>                    |          |         | -0.002*** | (0.000) | -0.001*** | (0.000) |
| Number of major powers <sub>j</sub>        |          |         | -0.001    | (0.000) | 0.009***  | (0.001) |
| Number of member states <sub>j</sub>       |          |         | -0.001    | (0.001) | 0.002     | (0.002) |
| Difference in major powers <sub>ij</sub>   |          |         |           |         | 0.007***  | (0.000) |
| Difference in ideal points <sub>ij</sub>   |          |         |           |         | 0.001     | (0.001) |
| Fixed effects                              | Yes      |         | Yes       |         | Yes       |         |
| Time period dummies                        | Yes      |         | Yes       |         | Yes       |         |
| Observations                               | 106701   |         | 91815     |         | 46479     |         |
| Within-R2                                  | 0.155    |         | 0.152     |         | 0.139     |         |

Notes: Ordinary Least Squares regression with fixed effects and clustered standard errors on organizations. Significance levels: ° p<.1 \* p<.05 \*\* p<.01 \*\*\* p<.001.

**Table A18** Determinants of IGO design similarity using the Jaccard index

|                                              | (1)              | (2)               | (3)               |
|----------------------------------------------|------------------|-------------------|-------------------|
| <i>IGO design similarity (Jaccard index)</i> |                  |                   |                   |
| Overlap <sub>ij</sub>                        | 0.111*** (0.029) | 0.144*** (0.029)  | 0.143*** (0.034)  |
| Number of shared issue areas <sub>ij</sub>   | -0.007** (0.002) | -0.007*** (0.002) | -0.010*** (0.003) |
| Shared region <sub>ij</sub>                  | 0.001 (0.003)    | 0.004 (0.003)     | 0.005° (0.003)    |
| Start year <sub>j</sub>                      |                  | 0.001*** (0.000)  | -0.000 (0.000)    |
| Number of major powers <sub>j</sub>          |                  | -0.001 (0.001)    | -0.013*** (0.001) |
| Number of member states <sub>j</sub>         |                  | -0.010*** (0.002) | -0.007*** (0.002) |
| Difference in major powers <sub>ij</sub>     |                  |                   | 0.011*** (0.000)  |
| Difference in ideal points <sub>ij</sub>     |                  |                   | 0.005*** (0.001)  |
| Fixed effects                                | Yes              | Yes               | Yes               |
| Time period dummies                          | Yes              | Yes               | Yes               |
| Observations                                 | 132934           | 115762            | 53369             |
| Within-R2                                    | 0.197            | 0.201             | 0.139             |

*Notes:* Ordinary Least Squares regression with fixed effects and clustered standard errors on organizations. Significance levels: ° p<.1 \* p<.05 \*\* p<.01 \*\*\* p<.001.

**Table A19** Element-wise IGO design similarity

|                                            | (1)<br>Secretaria<br>t | (2)<br>Voting     | (3)<br>Monitori<br>ng | (4)<br>Enforcem<br>ent | (5)<br>Dispute<br>settlemen<br>t |
|--------------------------------------------|------------------------|-------------------|-----------------------|------------------------|----------------------------------|
| <i>IGO design similarity</i>               |                        |                   |                       |                        |                                  |
| Overlap <sub>ij</sub>                      | 0.089° (0.050)         | 0.277*** (0.045)  | 0.168* (0.069)        | 0.196* (0.079)         | 0.218*** (0.060)                 |
| Number of shared issue areas <sub>ij</sub> | 0.034*** (0.003)       | -0.008*** (0.002) | 0.057*** (0.004)      | 0.030*** (0.003)       | 0.019*** (0.003)                 |
| Shared issue profile <sub>ij</sub>         | -0.009*** (0.003)      | 0.008* (0.003)    | -0.012** (0.004)      | -0.006 (0.004)         | 0.002 (0.012)                    |
| Shared region <sub>ij</sub>                | -0.002*** (0.000)      | 0.000*** (0.000)  | -0.000 (0.000)        | -0.001*** (0.000)      | 0.002*** (0.000)                 |
| Start year <sub>j</sub>                    | -0.032*** (0.001)      | -0.023*** (0.001) | -0.008*** (0.000)     | -0.010*** (0.000)      | -0.034*** (0.001)                |
| Number of major powers <sub>j</sub>        | 0.014*** (0.000)       | 0.054*** (0.002)  | 0.022*** (0.001)      | 0.028*** (0.002)       | 0.054*** (0.002)                 |
| Fixed effects                              | Yes                    | Yes               | Yes                   | Yes                    | Yes                              |
| Time period dummies                        | Yes                    | Yes               | Yes                   | Yes                    | Yes                              |
| Observations                               | 112840                 | 93775             | 49765                 | 37372                  | 59872                            |
| Within-R2                                  | 0.337                  | 0.248             | 0.119                 | 0.106                  | 0.171                            |

Notes: Ordinary Least Squares regression with fixed effects and clustered standard errors on organizations. Significance levels: ° p<.1 \* p<.05 \*\* p<.01 \*\*\* p<.001.

**Table A20** Governance task overlap and element-wise IGO design similarity

|                                            | (1)<br>Secretaria<br>t | (2)<br>Voting     | (3)<br>Monitori<br>ng | (4)<br>Enforcem<br>ent | (5)<br>Dispute<br>settlemen<br>t |
|--------------------------------------------|------------------------|-------------------|-----------------------|------------------------|----------------------------------|
| <i>IGO design similarity</i>               |                        |                   |                       |                        |                                  |
| Governance task overlap <sub>ij</sub>      | 0.219*** (0.008)       | 0.088*** (0.008)  | 0.186*** (0.023)      | 0.123*** (0.022)       | 0.084*** (0.014)                 |
| Number of shared issue areas <sub>ij</sub> | 0.030*** (0.003)       | -0.007** (0.002)  | 0.056*** (0.004)      | 0.031*** (0.003)       | 0.018*** (0.003)                 |
| Shared issue profile <sub>ij</sub>         | -0.013*** (0.003)      | 0.010** (0.004)   | -0.012** (0.004)      | -0.003 (0.004)         | 0.005 (0.011)                    |
| Shared region <sub>ij</sub>                | -0.002*** (0.000)      | -0.005*** (0.000) | 0.000 (0.000)         | -0.000*** (0.000)      | -0.001*** (0.000)                |
| Start year <sub>j</sub>                    | -0.030*** (0.001)      | -0.023*** (0.001) | -0.006*** (0.000)     | -0.008*** (0.000)      | -0.034*** (0.001)                |
| Number of major powers <sub>j</sub>        | 0.008*** (0.000)       | 0.051*** (0.001)  | 0.017*** (0.001)      | 0.024*** (0.002)       | 0.052*** (0.002)                 |
| Fixed effects                              | Yes                    | Yes               | Yes                   | Yes                    | Yes                              |
| Time period dummies                        | Yes                    | Yes               | Yes                   | Yes                    | Yes                              |
| Observations                               | 115512                 | 95958             | 50486                 | 37895                  | 61400                            |
| Within-R2                                  | 0.350                  | 0.253             | 0.133                 | 0.114                  | 0.174                            |

Notes: Ordinary Least Squares regression with fixed effects and clustered standard errors on organizations. Significance levels: ° p<.1 \* p<.05 \*\* p<.01 \*\*\* p<.001.

**Table A21** Determinants of IGO design similarity using five-year fixed effects

|                                            | (1)      |         | (2)       |         | (3)       |         |
|--------------------------------------------|----------|---------|-----------|---------|-----------|---------|
| <i>IGO design similarity</i>               |          |         |           |         |           |         |
| Overlap <sub>ij</sub>                      | 0.118*** | (0.025) | 0.124***  | (0.026) | 0.079*    | (0.033) |
| Number of shared issue areas <sub>ij</sub> | 0.005*** | (0.001) | 0.004*    | (0.002) | 0.005*    | (0.002) |
| Shared region <sub>ij</sub>                | -0.001   | (0.002) | 0.002     | (0.002) | 0.002     | (0.003) |
| Start year <sub>j</sub>                    |          |         | -0.002*** | (0.000) | -0.001*** | (0.000) |
| Number of major powers <sub>j</sub>        |          |         | -0.001    | (0.000) | 0.003***  | (0.001) |
| Number of member states <sub>j</sub>       |          |         | -0.002°   | (0.001) | 0.003     | (0.002) |
| Difference in major powers <sub>ij</sub>   |          |         |           |         | 0.003***  | (0.000) |
| Difference in ideal points <sub>ij</sub>   |          |         |           |         | -0.001    | (0.001) |
| Fixed effects                              | Yes      |         | Yes       |         | Yes       |         |
| Time period dummies                        | Yes      |         | Yes       |         | Yes       |         |
| Observations                               | 107627   |         | 92365     |         | 46783     |         |
| Within-R2                                  | 0.159    |         | 0.160     |         | 0.142     |         |

*Notes:* Linear regression with fixed effects on IGO *i*. Robust standard errors clustered on IGO *i* in parentheses. Significance levels: °  $p < .1$  \*  $p < .05$  \*\*  $p < .01$  \*\*\*  $p < 0.001$ .

**Table A22** Determinants of IGO design similarity using year-fixed effects

|                                            | (1)                 | (2)                 | (3)               |
|--------------------------------------------|---------------------|---------------------|-------------------|
| <i>IGO design similarity</i>               |                     |                     |                   |
| Overlap <sub>ij</sub>                      | 0.118***<br>(0.025) | 0.124***<br>(0.026) | 0.079*<br>(0.033) |
| Number of shared issue areas <sub>ij</sub> | 0.005***<br>(0.001) | 0.004*<br>(0.002)   | 0.005*<br>(0.002) |
| Shared region <sub>ij</sub>                | -0.001<br>(0.002)   | 0.002<br>(0.002)    | 0.002<br>(0.003)  |
| Start year <sub>j</sub>                    |                     |                     |                   |
| Number of major powers <sub>j</sub>        |                     | -0.001<br>(0.000)   | 0.001<br>(0.001)  |
| Number of member states <sub>j</sub>       |                     | -0.002°<br>(0.001)  | 0.003<br>(0.002)  |
| Difference in major powers <sub>ij</sub>   |                     |                     |                   |
| Difference in ideal points <sub>ij</sub>   |                     |                     | -0.001<br>(0.001) |
| Fixed effects                              | Yes                 | Yes                 | Yes               |
| Time period dummies                        | Yes                 | Yes                 | Yes               |
| Observations                               | 107627              | 92365               | 46783             |
| Within-R2                                  | 0.159               | 0.160               | 0.142             |

*Notes:* Linear regression with fixed effects on IGO *i*. Robust standard errors clustered on IGO *i* in parentheses. Significance levels: °  $p < .1$  \*  $p < .05$  \*\*  $p < .01$  \*\*\*  $p < 0.001$ .

**Table A23** Determinants of IGO design similarity using imputed data on control variables

|                                            | (1)      |         | (2)      |         | (3)      |         |
|--------------------------------------------|----------|---------|----------|---------|----------|---------|
| <i>IGO design similarity</i>               |          |         |          |         |          |         |
| Overlap <sub>ij</sub>                      | 0.118*** | (0.025) | 0.123*** | (0.025) | 0.122*** | (0.025) |
| Number of shared issue areas <sub>ij</sub> | 0.005*** | (0.001) | 0.005*** | (0.001) | 0.005*** | (0.001) |
| Shared region <sub>ij</sub>                | -0.001   | (0.002) | -0.001   | (0.002) | -0.001   | (0.002) |
| Start year <sub>j</sub>                    |          |         | 0.000    | (0.000) | 0.000°   | (0.000) |
| Number of major powers <sub>j</sub>        |          |         | 0.001°   | (0.000) | 0.002*   | (0.001) |
| Number of member states <sub>j</sub>       |          |         | -0.002   | (0.001) | -0.002   | (0.001) |
| Difference in major powers <sub>ij</sub>   |          |         |          |         | 0.002°   | (0.001) |
| Difference in ideal points <sub>ij</sub>   |          |         |          |         | -0.003** | (0.001) |
| Fixed effects                              | Yes      |         | Yes      |         | Yes      |         |
| Time period dummies                        | Yes      |         | Yes      |         | Yes      |         |
| Observations                               | 107626   |         | 107626   |         | 107626   |         |
| Within-R2                                  | 0.159    |         | 0.159    |         | 0.159    |         |

*Notes:* Linear regression with fixed effects on IGO *i*. Robust standard errors clustered on IGO *i* in parentheses. Significance levels: °  $p < .1$  \*  $p < .05$  \*\*  $p < .01$  \*\*\*  $p < .001$ .

**Table A24** Determinants of IGO design similarity separately for successful and unsuccessful pre-existing IGOs using imputed data on controls

|                                            | Successful pre-existing IGOs |                     |                     | Unsuccessful pre-existing IGOs |                     |                      |
|--------------------------------------------|------------------------------|---------------------|---------------------|--------------------------------|---------------------|----------------------|
|                                            | (1)                          | (2)                 | (3)                 | (4)                            | (5)                 | (6)                  |
| Overlap <sub>ij</sub>                      | 0.130***<br>(0.026)          | 0.136***<br>(0.026) | 0.137***<br>(0.026) | 0.072°<br>(0.041)              | 0.072°<br>(0.041)   | 0.065<br>(0.041)     |
| Number of shared issue areas <sub>ij</sub> | 0.005**<br>(0.002)           | 0.004**<br>(0.002)  | 0.004**<br>(0.002)  | 0.008***<br>(0.002)            | 0.008***<br>(0.002) | 0.008***<br>(0.002)  |
| Shared region <sub>ij</sub>                | -0.001<br>(0.003)            | -0.001<br>(0.002)   | -0.001<br>(0.002)   | 0.002<br>(0.003)               | 0.002<br>(0.003)    | 0.000<br>(0.003)     |
| Start year <sub>j</sub>                    |                              | 0.000***<br>(0.000) | 0.000***<br>(0.000) |                                | -0.000<br>(0.000)   | 0.000°<br>(0.000)    |
| Number of major powers <sub>j</sub>        |                              | -0.000<br>(0.000)   | 0.001<br>(0.001)    |                                | -0.000<br>(0.001)   | 0.003<br>(0.002)     |
| Number of member states <sub>j</sub>       |                              | -0.001<br>(0.001)   | -0.001<br>(0.001)   |                                | 0.000<br>(0.001)    | 0.002°<br>(0.001)    |
| Difference in major powers <sub>ij</sub>   |                              |                     | 0.001<br>(0.001)    |                                |                     | 0.004*<br>(0.002)    |
| Difference in ideal points <sub>ij</sub>   |                              |                     | 0.001<br>(0.001)    |                                |                     | -0.017***<br>(0.002) |
| Fixed effects                              | Yes                          | Yes                 | Yes                 | Yes                            | Yes                 | Yes                  |
| Time period dummies                        | Yes                          | Yes                 | Yes                 | Yes                            | Yes                 | Yes                  |
| Observations                               | 82839                        | 82839               | 82839               | 24788                          | 24788               | 24788                |
| Within-R2                                  | 0.151                        | 0.152               | 0.152               | 0.243                          | 0.243               | 0.246                |

*Notes:* Linear regression with fixed effects on IGO  $i$ . Robust standard errors clustered on IGO  $i$  in parentheses. “Success” is defined as survival of IGO  $j$  up until the year in which IGO  $i$  was created. Significance levels: °  $p < .1$  \*  $p < .05$  \*\*  $p < .01$  \*\*\*  $p < .001$ .



**Table A25** Determinants of IGO design similarity accounting for partial observability of IGO creation

|                                            | (1)                  | (2)                  | (3)                  |
|--------------------------------------------|----------------------|----------------------|----------------------|
| <i>IGO dyad creation</i>                   |                      |                      |                      |
| Overlap <sub>ij</sub>                      | -2.184***<br>(0.361) | -2.368***<br>(0.374) | -1.209***<br>(0.350) |
| Past creations <sub>i</sub>                | -0.006***<br>(0.002) | -0.006***<br>(0.002) | -0.004*<br>(0.002)   |
| Number of shared issue areas <sub>ij</sub> | 0.025**<br>(0.008)   | 0.025**<br>(0.008)   | -0.003<br>(0.008)    |
| Shared region <sub>ij</sub>                | 0.645***<br>(0.043)  | 0.714***<br>(0.046)  | 0.454***<br>(0.035)  |
| Number of member states <sub>i</sub>       | 0.405***<br>(0.060)  | 0.405***<br>(0.060)  | 0.500***<br>(0.073)  |
| Start year <sub>i</sub>                    | -0.018*<br>(0.007)   | -0.015*<br>(0.007)   | -0.035***<br>(0.010) |
| States in system <sub>i</sub>              | 1.388***<br>(0.197)  | 1.229***<br>(0.193)  | 2.520***<br>(0.293)  |
| Start year <sub>j</sub>                    |                      | 0.000°<br>(0.000)    | -0.001<br>(0.001)    |
| Number of major powers <sub>j</sub>        |                      | -0.002<br>(0.003)    | -0.078*<br>(0.032)   |
| Number of member states <sub>j</sub>       |                      | 0.010***<br>(0.003)  | 0.000<br>(0.006)     |
| Difference in major powers <sub>ij</sub>   |                      |                      | -0.090**<br>(0.034)  |
| Difference in ideal points <sub>ij</sub>   |                      |                      | 0.063°<br>(0.037)    |
| <i>IGO design similarity</i>               |                      |                      |                      |
| Overlap <sub>ij</sub>                      | 0.253***<br>(0.028)  | 0.173***<br>(0.026)  | 0.149***<br>(0.035)  |
| Shared region <sub>ij</sub>                | 0.004**<br>(0.001)   | -0.002<br>(0.001)    | 0.002<br>(0.002)     |
| Number of shared issue areas <sub>ij</sub> | 0.002<br>(0.003)     | 0.002<br>(0.003)     | 0.002<br>(0.003)     |
| Start year <sub>j</sub>                    |                      | 0.001***<br>(0.000)  | 0.002***<br>(0.000)  |
| Number of major powers <sub>j</sub>        |                      | 0.002***<br>(0.000)  | -0.008***<br>(0.001) |
| Number of member states <sub>j</sub>       |                      | 0.027***<br>(0.001)  | 0.032***<br>(0.001)  |
| Difference in major powers <sub>ij</sub>   |                      |                      | 0.001***<br>(0.000)  |
| Difference in ideal points <sub>ij</sub>   |                      |                      | -0.009***<br>(0.001) |
| Issue area dummies (Equation 1)            | Yes                  | Yes                  | Yes                  |
| Governance task dummies (Equation 1)       | Yes                  | Yes                  | Yes                  |
| Fixed effects (Equation 2)                 | Yes                  | Yes                  | Yes                  |
| Observations (Equation 1)                  | 176381               | 152494               | 72581                |
| Pseudo-R2 (Equation 1)                     | 0.388                | 0.387                | 0.419                |

|                           |        |        |       |
|---------------------------|--------|--------|-------|
| F-statistic (Equation 1)  | 14.497 | 15.657 | 5.070 |
| Observations (Equation 2) | 88693  | 76031  | 41187 |
| Within-R2 (Equation 2)    | 0.002  | 0.021  | 0.022 |

---

*Notes:* Maximum-likelihood estimation of a system of two equations with fixed effects. Robust clustered standard errors in parentheses. Significance levels: \*  $p < .1$  \*\*  $p < .05$  \*\*\*  $p < .01$ .

**Table A26** Determinants of IGO design similarity without fixed effects and additional controls

|                                            | (1)              | (2)              | (3)              | (4)              |
|--------------------------------------------|------------------|------------------|------------------|------------------|
| <i>IGO design similarity</i>               |                  |                  |                  |                  |
| Overlap <sub>ij</sub>                      | 0.121*** (0.032) | 0.121*** (0.032) | 0.132*** (0.033) | 0.122*** (0.032) |
| Number of shared issue areas <sub>ij</sub> | 0.004* (0.002)   | 0.004* (0.002)   | 0.004* (0.002)   | 0.004* (0.002)   |
| Shared region <sub>ij</sub>                | 0.001 (0.003)    | 0.000 (0.003)    | 0.001 (0.003)    | 0.001 (0.003)    |
| Security <sub>i</sub>                      | -0.045* (0.020)  | -0.042* (0.020)  | -0.049* (0.021)  | -0.045* (0.020)  |
| Environment <sub>i</sub>                   | -0.000 (0.012)   | -0.001 (0.012)   | -0.000 (0.012)   | -0.000 (0.012)   |
| Health <sub>i</sub>                        | 0.004 (0.013)    | 0.004 (0.013)    | 0.009 (0.012)    | 0.004 (0.013)    |
| Human rights <sub>i</sub>                  | -0.020 (0.019)   | -0.019 (0.019)   | -0.020 (0.020)   | -0.020 (0.019)   |
| Trade and commerce <sub>i</sub>            | 0.011 (0.011)    | 0.011 (0.011)    | 0.011 (0.011)    | 0.011 (0.011)    |
| Finance <sub>i</sub>                       | -0.000 (0.015)   | 0.001 (0.015)    | -0.001 (0.015)   | -0.000 (0.015)   |
| Development <sub>i</sub>                   | -0.000 (0.011)   | -0.000 (0.011)   | -0.001 (0.011)   | -0.000 (0.011)   |
| Social affairs <sub>i</sub>                | 0.001 (0.009)    | 0.001 (0.009)    | -0.001 (0.009)   | 0.001 (0.009)    |
| Technical issues <sub>i</sub>              | 0.013 (0.009)    | 0.014 (0.009)    | 0.013 (0.009)    | 0.013 (0.009)    |
| Norm-setting <sub>i</sub>                  | -0.000 (0.012)   | -0.001 (0.012)   | -0.000 (0.012)   | -0.000 (0.012)   |
| Implementation                             | 0.004 (0.011)    | 0.005 (0.011)    | 0.003 (0.011)    | 0.004 (0.011)    |
| Monitoring <sub>i</sub>                    | -0.020 (0.014)   | -0.018 (0.014)   | -0.025° (0.015)  | -0.020 (0.014)   |
| Funding <sub>i</sub>                       | 0.008 (0.011)    | 0.007 (0.011)    | 0.009 (0.011)    | 0.008 (0.011)    |
| Capacity-building <sub>i</sub>             | -0.004 (0.010)   | -0.003 (0.010)   | -0.003 (0.010)   | -0.004 (0.010)   |
| Service provision <sub>i</sub>             | 0.022° (0.011)   | 0.022° (0.011)   | 0.023* (0.012)   | 0.022° (0.011)   |
| Agenda-setting <sub>i</sub>                | -0.003 (0.010)   | -0.002 (0.010)   | -0.005 (0.010)   | -0.003 (0.010)   |
| Information provision <sub>i</sub>         | 0.022 (0.017)    | 0.021 (0.016)    | 0.025 (0.017)    | 0.022 (0.017)    |
| Africa <sub>i</sub>                        | 0.013 (0.012)    | 0.014 (0.012)    | 0.012 (0.012)    | 0.013 (0.012)    |
| Asia and Oceania <sub>i</sub>              | -0.005 (0.024)   | -0.005 (0.024)   | -0.006 (0.024)   | -0.005 (0.024)   |
| Middle East <sub>i</sub>                   | 0.015 (0.015)    | 0.016 (0.015)    | 0.016 (0.015)    | 0.015 (0.015)    |
| Europe and North America <sub>i</sub>      | -0.004 (0.014)   | -0.004 (0.014)   | -0.007 (0.014)   | -0.004 (0.014)   |
| Latin America <sub>i</sub>                 | 0.019 (0.017)    | 0.021 (0.017)    | 0.018 (0.016)    | 0.019 (0.017)    |
| 1945-54                                    | -0.098** (0.037) | -0.105** (0.038) | 0.000 (.)        | -0.098** (0.037) |

|                                      |         |         |         |         |         |         |         |         |
|--------------------------------------|---------|---------|---------|---------|---------|---------|---------|---------|
| 1955-64                              | -0.111* | (0.048) | -0.115* | (0.049) | 0.018   | (0.029) | -0.111* | (0.048) |
| 1965-74                              | -0.143* | (0.061) | -0.146* | (0.062) | 0.023   | (0.048) | -0.143* | (0.061) |
| 1975-84                              | -0.142* | (0.069) | -0.141* | (0.069) | 0.045   | (0.061) | -0.142* | (0.069) |
| 1985-94                              | -0.186* | (0.087) | -0.196* | (0.086) | -0.010  | (0.082) | -0.186* | (0.087) |
| 1995-2004                            | -0.155  | (0.094) | -0.149  | (0.095) | 0.016   | (0.094) | -0.155  | (0.094) |
| 2005-14                              | -0.167  | (0.106) | -0.148  | (0.109) | 0.011   | (0.110) | -0.167  | (0.106) |
| Start year <sub>j</sub>              | 0.002   | (0.001) | 0.003*  | (0.001) | -0.000  | (0.002) | 0.002   | (0.001) |
| Number of major powers <sub>j</sub>  | -0.000  | (0.000) | -0.000  | (0.000) | -0.001  | (0.000) | -0.000  | (0.000) |
| Number of member states <sub>j</sub> | -0.002° | (0.001) | -0.002° | (0.001) | -0.002  | (0.001) | -0.002° | (0.001) |
| Logged density                       |         |         | -0.789  | (0.581) |         |         |         |         |
| Logged squared density               |         |         | 0.373   | (0.279) |         |         |         |         |
| Preference heterogeneity             |         |         |         |         | -0.155* | (0.068) |         |         |
| Progeny <sub>ij</sub>                |         |         |         |         |         |         | -0.014  | (0.026) |
| Fixed effects                        | No      |         | No      |         | No      |         |         |         |
| Observations                         | 92365   |         | 92365   |         | 89709   |         | 92365   |         |
| Within-R2                            | 0.017   |         | 0.017   |         | 0.019   |         | 0.017   |         |

Notes: Ordinary Least Squares regression with standard errors clustered on organizations. Significance levels: ° p<0.1 \* p<.05 \*\* p<.01 \*\*\* p<.001.

**Table A27** Problematic COW IGO cases by COW problem type

| Abbreviation | IGO name                                                                             | Type I | Type II | Type III | Type IV |
|--------------|--------------------------------------------------------------------------------------|--------|---------|----------|---------|
| ACPEU        | ACP/EU Joint Assembly                                                                | 1      | 0       | 1        | 0       |
| INFSMK       | Centre for Marketing Information and Advisory Services for Fishery                   | 1      | 0       | 0        | 0       |
| COSAVE       | Comité Regional de Sanidad Vegetal del Cono Sur                                      | 1      | 1       | 0        | 0       |
| CFC          | Common Fund for Commodities                                                          | 0      | 1       | 0        | 0       |
| AMCO         | African Malagasy Coffee Organisation                                                 | 0      | 1       | 0        | 0       |
| CEC          | Commonwealth Economic Committee                                                      | 0      | 1       | 0        | 0       |
| CELC         | Commonwealth Education Liaison Committee                                             | 0      | 1       | 0        | 0       |
| AMCOW        | African Ministers' Council on Water                                                  | 1      | 0       | 0        | 0       |
| CTO          | Commonwealth Telecom Board                                                           | 0      | 0       | 0        | 1       |
| CONFESJES    | Conférence des ministres de la jeunesse et des sports des pays d'expression français | 1      | 0       | 0        | 0       |
| CAMRSD       | Conference African Ministers for Sustainable Development                             | 1      | 0       | 0        | 0       |
| COPTAC       | Conference of Posts and Telecommunications Administrations of Central Africa         | 0      | 1       | 0        | 0       |
| CMAEC        | Council of Ministers for Asian Economic Cooperation                                  | 1      | 0       | 0        | 0       |
| CMHASG       | Council of Ministers of Health of Arab Gulf States                                   | 0      | 1       | 0        | 0       |
| DBGLS        | Development Bank of Great Lake States                                                | 0      | 0       | 1        | 0       |
| ECCAS        | Economic Community of Central African States                                         | 0      | 0       | 1        | 0       |
| ECO          | Economic Cooperation Organization                                                    | 0      | 0       | 0        | 1       |
| ERIA         | Economic Research Institute for ASEAN and East Asia                                  | 0      | 0       | 1        | 0       |
| EMB          | Empire Marketing Board                                                               | 1      | 0       | 0        | 0       |
| EAPC         | Euro-Atlantic Partnership Council                                                    | 1      | 0       | 0        | 0       |
| EMPPPO       | European and Mediterranean Plant Protection Organisation                             | 1      | 1       | 0        | 0       |
| EURATOM      | European Atomic Energy Agency                                                        | 1      | 0       | 0        | 0       |
| ECB          | European Central Bank                                                                | 0      | 0       | 1        | 0       |
| ECSC         | European Coal and Steel Community                                                    | 1      | 0       | 0        | 0       |
| AFPU         | African Postal Union                                                                 | 0      | 1       | 0        | 0       |
| EUFMD        | European Commission for the Control of Foot and Mouth Disease                        | 1      | 0       | 0        | 0       |
| ECPTA        | European Conference of Postal and Telecommunications Administrations                 | 0      | 1       | 0        | 0       |

|          |                                                                                                                                                 |   |   |   |   |
|----------|-------------------------------------------------------------------------------------------------------------------------------------------------|---|---|---|---|
| EFILWC   | European Foundation for the Improvement of Living and Working Conditions                                                                        | 1 | 0 | 0 | 0 |
| ARIPO    | African Regional Industrial Property Organization                                                                                               | 0 | 0 | 1 | 0 |
| EMI      | European Monetary Institute                                                                                                                     | 1 | 0 | 1 | 0 |
| EPFSC    | European Postal Financial Services Commission                                                                                                   | 0 | 1 | 0 | 0 |
| EPA      | European Productivity Agency                                                                                                                    | 1 | 0 | 0 | 0 |
| Africare | African Reinsurance Corporation                                                                                                                 | 1 | 0 | 0 | 0 |
| ETF      | European Training Foundation                                                                                                                    | 1 | 1 | 0 | 0 |
| FAO      | Food and Agriculture Organization                                                                                                               | 0 | 1 | 0 | 0 |
| GEF      | Global Environmental Fund                                                                                                                       | 1 | 0 | 0 | 0 |
| ACSSRB   | Administrative Center for Social Security for Rhine Boatmen                                                                                     | 1 | 0 | 0 | 0 |
| IABE     | Ibero-American Office of Education                                                                                                              | 1 | 0 | 0 | 0 |
| IDC      | Imperial Defense Committee                                                                                                                      | 1 | 0 | 0 | 0 |
| APFIC    | Asia Pacific Fisheries Commission                                                                                                               | 1 | 1 | 0 | 0 |
| IACS     | Inter-African Committee on Statistics                                                                                                           | 1 | 0 | 0 | 0 |
| IACI     | Inter-American Children's Institute                                                                                                             | 0 | 1 | 0 | 0 |
| IACW     | Inter American Commission of Women                                                                                                              | 0 | 1 | 0 | 0 |
| IAII     | Inter-American Indian Institute                                                                                                                 | 0 | 1 | 0 | 0 |
| IAIAS    | Inter-American Institute of Agricultural Science                                                                                                | 0 | 1 | 0 | 0 |
| IAIC     | Inter-American Investment Corporation                                                                                                           | 0 | 1 | 0 | 0 |
| IBI      | Intergovernmental Bureau for Informatics                                                                                                        | 0 | 0 | 1 | 0 |
| IGCC     | Intergovernmental Copyright Committee                                                                                                           | 1 | 1 | 1 | 0 |
| IOcC     | Intergovernmental Oceanographic Committee                                                                                                       | 1 | 1 | 0 | 0 |
| INFOFISH | Intergovernmental Organization for Marketing Information and Technical<br>Advisory Services for Fishery Products in the Asia and Pacific Region | 1 | 0 | 1 | 0 |
| IBEC     | International Bank for Economic Co-operation                                                                                                    | 0 | 0 | 1 | 0 |
| ICCROM   | International Center for the Study of the Preservation and the Restoration of<br>Cultural Property                                              | 0 | 0 | 1 | 0 |
| AMPTU    | Afro-Malagasy Postal and Telecommunications Union                                                                                               | 0 | 1 | 0 | 0 |
| ICAO     | International Civil Aviation Organization                                                                                                       | 0 | 1 | 0 | 1 |
| ICDR     | International Commission for the Decennial Revision of the Nomenclature of the<br>Causes of Death                                               | 0 | 0 | 0 | 1 |
| ICSEAF   | International Commission for South East Atlantic Fisheries                                                                                      | 0 | 0 | 1 | 0 |

|         |                                                                                          |   |   |   |   |
|---------|------------------------------------------------------------------------------------------|---|---|---|---|
| IEA     | International Energy Agency                                                              | 0 | 1 | 1 | 0 |
| IFC     | International Finance Corporation                                                        | 0 | 1 | 0 | 0 |
| IFAD    | International Fund for Agriculture & Development                                         | 0 | 1 | 0 | 0 |
| ILO     | International Labour Organization                                                        | 1 | 1 | 0 | 0 |
| ILZSG   | International Lead and Zinc Study Group                                                  | 0 | 0 | 1 | 0 |
| IMO     | International Maritime Organisation                                                      | 0 | 1 | 0 | 0 |
| IMSO    | International Mobile Satellite Organisation                                              | 0 | 0 | 1 | 0 |
| IMF     | International Monetary Fund                                                              | 0 | 1 | 0 | 0 |
| IOPCF   | International Oil Pollution Compensation Funds                                           | 0 | 0 | 1 | 1 |
| IOOC    | International Olive Oil Council                                                          | 0 | 0 | 1 | 0 |
| IRO     | International Refugee Organisation                                                       | 0 | 1 | 0 | 0 |
| RIOPPAH | International Regional Organization against Plant and Animal Diseases                    | 0 | 1 | 0 | 0 |
| ISA     | International Seabed Authority                                                           | 0 | 0 | 1 | 0 |
| ITU     | International Telecom Union                                                              | 0 | 1 | 0 | 0 |
| IUIPI   | International Union for Protection of Industrial Property (Paris Convention)             | 1 | 0 | 0 | 0 |
| IUPLAW  | International Union for the Protection of Literary and Artistic Works (Berne Convention) | 1 | 0 | 0 | 0 |
| ISB     | Interstate Bank                                                                          | 0 | 0 | 1 | 0 |
| ISDB    | Islamic Development Bank                                                                 | 0 | 1 | 0 | 0 |
| JNOLCRH | Joint Nordic Organization for Lappish Culture and Reindeer Husbandry                     | 0 | 1 | 1 | 0 |
| LAFDO   | Latin American Fisheries Development Organisation                                        | 0 | 0 | 1 | 0 |
| MARRI   | Migration, Asylum, Refugees Regional Initiative                                          | 1 | 0 | 0 | 0 |
| MCPTTC  | Multi-Country Posts and Telecommunications Training Centre, Blantyre                     | 1 | 0 | 1 | 0 |
| MIGA    | Multilateral Investment Guarantee Agency                                                 | 0 | 1 | 0 | 0 |
| NVC     | Nordic Centre for Welfare and Social Issues                                              | 1 | 0 | 0 | 0 |
| NDF     | Nordic Development Fund                                                                  | 1 | 0 | 0 | 0 |
| NERC    | Nordic Economic Research Council                                                         | 1 | 0 | 1 | 0 |
| NIB     | Nordic Investment Bank                                                                   | 1 | 0 | 0 | 0 |
| NAPPO   | North American Plant Protection Organisation                                             | 1 | 1 | 1 | 0 |
| ABEDA   | Arab Bank for Economic Development in Africa                                             | 0 | 1 | 0 | 0 |
| PAP     | Pan-African Parliament                                                                   | 1 | 0 | 0 | 0 |
| PAIGH   | Pan American Institute of Geography and History                                          | 0 | 1 | 0 | 0 |

|         |                                                                     |   |   |   |   |
|---------|---------------------------------------------------------------------|---|---|---|---|
| PAHO    | Pan American Sanitary Bureau                                        | 0 | 1 | 0 | 0 |
| ACML    | Arab Center for Medical Literature                                  | 1 | 0 | 0 | 0 |
| PAPU    | Pan African Postal Union                                            | 0 | 1 | 0 | 0 |
| AMSC    | African and Malagasy Sugar Council                                  | 0 | 1 | 0 | 0 |
| PED     | Pole European de Development                                        | 1 | 0 | 0 | 0 |
| PUASP   | Postal Union of Americas, Spain and Portugal                        | 0 | 1 | 0 | 0 |
| RCFC    | Regional Commonwealth in the Field of Communications                | 0 | 1 | 0 | 0 |
| ARCAL   | Regional Cooperation Agreement for the Promotion of Nuclear Science | 1 | 0 | 0 | 0 |
| RCC     | Regional Cooperation Council                                        | 1 | 0 | 0 | 0 |
| SWAPU   | South and West Asia Postal Union                                    | 0 | 1 | 0 | 0 |
| SITTDEC | South Investment, Trade and Technological Data Exchange Centre      | 0 | 0 | 1 | 0 |
| AFESD   | Arab Fund for Economic and Social Development                       | 0 | 1 | 0 | 0 |
| SAAFA   | Special Arab Aid Fund for Africa                                    | 1 | 0 | 0 | 0 |
| AGPUNDO | Arab Gulf Program for United Nations Development Organisations      | 0 | 1 | 0 | 0 |
| IUPNVP  | Union for Protection of New Varieties of Plants                     | 1 | 0 | 0 | 0 |
| AIDO    | Arab Industrial Development and Mining Organization                 | 0 | 1 | 0 | 0 |
| UNESCO  | United Nations Educational, Scientific, and Cultural Organization   | 0 | 1 | 0 | 0 |
| UNIDO   | United Nations Industrial Development Organisation                  | 1 | 1 | 1 | 0 |
| UPU     | Universal Postal Union                                              | 0 | 1 | 0 | 0 |
| WAHC    | West African Health Community                                       | 1 | 0 | 1 | 0 |
| WAHO    | West African Health Organization                                    | 0 | 1 | 0 | 0 |
| WMO     | World Meteorological Organisation                                   | 0 | 1 | 0 | 0 |
| WHO     | World Health Organisation                                           | 0 | 1 | 0 | 0 |
| WIPO    | World Intellectual Property Organisation                            | 0 | 1 | 0 | 0 |
| WTOURO  | World Tourism Organisation                                          | 0 | 1 | 0 | 0 |
| ALO     | Arab Labor Organisation                                             | 0 | 1 | 0 | 0 |
| AMF     | Arab Monetary Fund                                                  | 0 | 1 | 0 | 0 |
| AOAD    | Arab Organization for Agricultural Development                      | 0 | 1 | 0 | 0 |
| AOMR    | Arab Organisation for Mineral Resources                             | 0 | 1 | 0 | 0 |
| ARPU    | Arab Postal Union                                                   | 0 | 1 | 0 | 0 |
| AIDC    | Asian Industrial Development Council                                | 1 | 0 | 1 | 0 |
| AOPU    | Asian-Oceanic Postal Union                                          | 0 | 1 | 0 | 0 |



|          |                                                               |   |   |   |   |
|----------|---------------------------------------------------------------|---|---|---|---|
| ABEPSEAC | Association Between EEC and States of East African Community  | 1 | 0 | 1 | 0 |
| AATA     | Association of African Tax Administrators                     | 1 | 0 | 1 | 0 |
| BC       | Baltic Council                                                | 1 | 0 | 0 | 0 |
| AFEXIMB  | African Export Import Bank                                    | 0 | 0 | 1 | 0 |
| BIISEF   | Banque Internationale d'Information sur les Etats Francophone | 1 | 0 | 0 | 0 |
| BOBP     | Bay of Bengal Programme Inter-Governmental Organization       | 0 | 0 | 1 | 0 |
| BCSC     | British Commonwealth Scientific Committee                     | 1 | 0 | 0 | 0 |
| CDB      | Caribbean Development Bank                                    | 0 | 1 | 0 | 0 |
| CXC      | Caribbean Examinations Council                                | 0 | 1 | 0 | 0 |
| CPU      | Caribbean Postal Union                                        | 0 | 1 | 0 | 0 |
| CAIPA    | Central American Institute for Public Administration          | 0 | 1 | 1 | 0 |

---

**Table A28** Models with reduced COW IGO sample

|                                            | (1)      |         | (2)       |         | (3)       |         |
|--------------------------------------------|----------|---------|-----------|---------|-----------|---------|
| <i>IGO design similarity</i>               |          |         |           |         |           |         |
| Overlap <sub>ij</sub>                      | 0.104*** | (0.029) | 0.107***  | (0.030) | 0.060     | (0.038) |
| Number of shared issue areas <sub>ij</sub> | 0.006*** | (0.002) | 0.005*    | (0.002) | 0.006*    | (0.002) |
| Shared region <sub>ij</sub>                | 0.001    | (0.002) | 0.005°    | (0.003) | 0.006°    | (0.003) |
| Start year <sub>j</sub>                    |          |         | -0.002*** | (0.000) | -0.001*** | (0.000) |
| Number of major powers <sub>j</sub>        |          |         | -0.000    | (0.000) | 0.003***  | (0.001) |
| Number of member states <sub>j</sub>       |          |         | -0.004*   | (0.002) | 0.002     | (0.002) |
| Difference in major powers <sub>ij</sub>   |          |         |           |         | 0.002***  | (0.000) |
| Difference in ideal points <sub>ij</sub>   |          |         |           |         | -0.001    | (0.001) |
| Fixed effects                              | Yes      |         | Yes       |         | Yes       |         |
| Time period dummies                        | Yes      |         | Yes       |         | Yes       |         |
| Observations                               | 81996    |         | 70327     |         | 36106     |         |
| Within-R2                                  | 0.142    |         | 0.142     |         | 0.132     |         |

*Notes:* Ordinary Least Squares regression with fixed effects and clustered standard errors on organizations. Significance levels: ° p<.1 \* p<.05 \*\* p<.01 \*\*\* p<.001.

**Table A29** The effect of institutional overlap on IGO design similarity across organizations of different geographical scope

|                     | Inter-continental IGOs       |                     |                    | Regional IGOs     |                   |                  |
|---------------------|------------------------------|---------------------|--------------------|-------------------|-------------------|------------------|
|                     | (1)                          | (2)                 | (3)                | (4)               | (5)               | (6)              |
|                     | <i>IGO design similarity</i> |                     |                    |                   |                   |                  |
| Overlap             | 0.181***<br>(0.040)          | 0.194***<br>(0.040) | 0.167**<br>(0.053) | 0.059*<br>(0.029) | 0.067*<br>(0.033) | 0.003<br>(0.039) |
| Time period dummies | Yes                          | Yes                 | Yes                | Yes               | Yes               | Yes              |
| Control set         | S1                           | S2                  | S3                 | S1                | S2                | S3               |
| Fixed effects       | Yes                          | Yes                 | Yes                | Yes               | Yes               | Yes              |
| Observations        | 39016                        | 33503               | 16697              | 68611             | 58862             | 30086            |
| Within-R2           | 0.205                        | 0.207               | 0.168              | 0.132             | 0.132             | 0.129            |

Notes: Ordinary Least Squares regression with fixed effects and clustered standard errors on organizations. Significance levels: ° p<.1 \* p<.05 \*\* p<.01 \*\*\* p<.001.

**Table A30** The effect of institutional overlap on IGO design similarity across organizations with different levels of mandate ambiguity

|                     | Single-issue IGO             |                    |                  | Multi-issue IGO     |                     |                    |
|---------------------|------------------------------|--------------------|------------------|---------------------|---------------------|--------------------|
|                     | (1)                          | (2)                | (3)              | (4)                 | (5)                 | (6)                |
|                     | <i>IGO design similarity</i> |                    |                  |                     |                     |                    |
| Overlap             | 0.092**<br>(0.031)           | 0.108**<br>(0.034) | 0.029<br>(0.048) | 0.165***<br>(0.038) | 0.173***<br>(0.040) | 0.144**<br>(0.046) |
| Time period dummies | Yes                          | Yes                | Yes              | Yes                 | Yes                 | Yes                |
| Control set         | S1                           | S2                 | S3               | S1                  | S2                  | S3                 |
| Fixed effects       | Yes                          | Yes                | Yes              | Yes                 | Yes                 | Yes                |
| Observations        | 44171                        | 37915              | 18904            | 63456               | 54450               | 27879              |
| Within-R2           | 0.217                        | 0.219              | 0.192            | 0.108               | 0.108               | 0.099              |

*Notes:* Ordinary Least Squares regression with fixed effects and clustered standard errors on organizations. Significance levels: ° p<.1 \* p<.05 \*\* p<.01 \*\*\* p<.001.

**Table A31** The effect of institutional overlap on IGO design similarity across organizations with different levels of governance task ambiguity

|                     | Limited task ambiguity        |                               |                  | High task ambiguity |                     |                   |
|---------------------|-------------------------------|-------------------------------|------------------|---------------------|---------------------|-------------------|
|                     | (1)                           | (2)                           | (3)              | War                 | (5)                 | (6)               |
|                     | <i>IGO design similarity</i>  |                               |                  |                     |                     |                   |
| Overlap             | 0.087 <sup>°</sup><br>(0.051) | 0.101 <sup>°</sup><br>(0.056) | 0.028<br>(0.064) | 0.126***<br>(0.028) | 0.128***<br>(0.029) | 0.092*<br>(0.038) |
| Time period dummies | Yes                           | Yes                           | Yes              | Yes                 | Yes                 | Yes               |
| Control set         | S1                            | S2                            | S3               | S1                  | S2                  | S3                |
| Fixed effects       | Yes                           | Yes                           | Yes              | Yes                 | Yes                 | Yes               |
| Observations        | 25726                         | 22106                         | 9847             | 81901               | 70259               | 36936             |
| Within-R2           | 0.219                         | 0.224                         | 0.208            | 0.130               | 0.130               | 0.114             |

*Notes:* Ordinary Least Squares regression with fixed effects and clustered standard errors on organizations. The sample is split at the median of the number of governance task of IGO *i*. Significance levels: <sup>°</sup> p<.1 \* p<.05 \*\* p<.01 \*\*\* p<.001.

**Table A32** The effect of institutional overlap on IGO design similarity across organizations with different levels of great power involvement

|                     | Any G7 member                |                     |                   | No G7 member       |                    |                  |
|---------------------|------------------------------|---------------------|-------------------|--------------------|--------------------|------------------|
|                     | (1)                          | (2)                 | (3)               | (4)                | (5)                | (6)              |
|                     | <i>IGO design similarity</i> |                     |                   |                    |                    |                  |
| Overlap             | 0.164***<br>(0.041)          | 0.191***<br>(0.042) | 0.118*<br>(0.055) | 0.092**<br>(0.030) | 0.087**<br>(0.032) | 0.056<br>(0.041) |
| Time period dummies | Yes                          | Yes                 | Yes               | Yes                | Yes                | Yes              |
| Control set         | S1                           | S2                  | S3                | S1                 | S2                 | S3               |
| Fixed effects       | Yes                          | Yes                 | Yes               | Yes                | Yes                | Yes              |
| Observations        | 41357                        | 34933               | 11805             | 66270              | 57432              | 34978            |
| Within-R2           | 0.169                        | 0.166               | 0.150             | 0.153              | 0.157              | 0.138            |

Notes: Ordinary Least Squares regression with fixed effects and clustered standard errors on organizations. Significance levels: ° p<.1 \* p<.05 \*\* p<.01 \*\*\* p<.001.

**Table A33** The effect of institutional overlap on IGO design similarity before and after the Cold War

|                     | Post-Cold War                |                    |         | Cold War |          |         |
|---------------------|------------------------------|--------------------|---------|----------|----------|---------|
|                     | (1)                          | (2)                | (3)     | (4)      | (5)      | (6)     |
|                     | <i>IGO design similarity</i> |                    |         |          |          |         |
| Overlap             | 0.115*                       | 0.110 <sup>o</sup> | 0.066   | 0.120*** | 0.132*** | 0.087*  |
|                     | (0.056)                      | (0.058)            | (0.049) | (0.027)  | (0.029)  | (0.043) |
| Time period dummies | Yes                          | Yes                | Yes     | Yes      | Yes      | Yes     |
| Control set         | S1                           | S2                 | S3      | S1       | S2       | S3      |
| Fixed effects       | Yes                          | Yes                | Yes     | Yes      | Yes      | Yes     |
| Observations        | 35966                        | 29573              | 18896   | 71661    | 62792    | 27887   |
| Within-R2           | 0.115                        | 0.113              | 0.108   | 0.176    | 0.177    | 0.156   |

Notes: Ordinary Least Squares regression with fixed effects and clustered standard errors on organizations. Significance levels: <sup>o</sup> p<.1 \* p<.05 \*\* p<.01 \*\*\* p<.001.

## Works cited

- Hooghe, Liesbet, Tobias Lenz, and Gary Marks. 2019. *A Theory of International Organization: A Postfunctionalist Theory of Governance*. Oxford: Oxford University Press.
- Hooghe, Liesbet and Gary Marks. 2015. "Delegation and pooling in international organizations." *Review of International Organizations* 10(3): 305-328.
- Pevehouse, Jon C., Timothy Nordstrom, Roseanne McManus, and Anne S. Jamison. 2020. "Tracking Organizations in the World: The Correlates of War IGO Version 3.0 Datasets." *Journal of Peace Research* 57(3): 492–503.
- Westerwinter, Oliver. 2021. "Transnational Public-Private Governance Initiatives in World Politics: Introducing a New Dataset." *Review of International Organizations* 16(1): 137–174.
